# Supplementary material for: Kynurenine pathway metabolites in cerebrospinal fluid and blood as potential biomarkers in Huntington's disease
Source: PubMed Central journal article supplement (PMC8375100; doi:10.1111/jnc.15360), 2021-05-05
Supplement: JNC-158-539-s001.pdf [file JNC-158-539-s001.pdf]

# Kynurenine pathway metabolites in cerebrospinal fluid and blood as potential biomarkers in Huntington's disease

Filipe B Rodrigues<sup>1†</sup>, Lauren M Byrne<sup>1†</sup>, Alexander J Lowe<sup>1</sup>, Rosanna Tortelli<sup>1</sup>, Mariette Heins<sup>2</sup>, Gunnar Flik<sup>2</sup>, Eileanoir B Johnson<sup>1</sup>, Enrico De Vita<sup>3,4</sup>, Rachael I Scahill<sup>1</sup>, Flaviano Giorgini<sup>5</sup> and Edward J Wild<sup>1\*</sup>

1 UCL Huntington's Disease Centre, UCL Queen Square Institute of Neurology, University College London, London, UK

2 Charles River Laboratories, Groningen, the Netherlands

3 Lysholm Department of Neuroradiology, National Hospital for Neurology and Neurosurgery, London, UK

4 Department of Biomedical Engineering, School of Biomedical Engineering and Imaging Sciences, King's College London, UK

5 Department of Genetics and Genome Biology, University of Leicester, Leicester, UK

† These authors contributed equally as first authors of this study

\* Dr Edward J Wild, e.wild@ucl.ac.uk, UCL Huntington's Disease Centre, University College London, 10-12 Russell Square, London WC1B 5EH

**Running title:** Kynurenine pathway in Huntington's disease

## Supplementary material

### Supplementary tables

Table S1 Cohort characteristics. CAG, CAG repeat count; DBS, Disease Burden Score; cUHDRS, composite Unified Huntington's Disease Rating Scale; N/A, not applicable; SD, standard deviation; SDMT, Symbol Digit Modalities Test; SCN, Stroop Color Naming; SWR, Stroop Word Reading; TFC, UHDRS Total Functional Capacity; TMS, UHDRS Total Motor Score; VFC, Verbal Fluency – Categorical.

|                                                             | All Participants |         |        | Healthy Controls |         |        | Premanifest HD |         |        | Manifest HD |         |        |
|-------------------------------------------------------------|------------------|---------|--------|------------------|---------|--------|----------------|---------|--------|-------------|---------|--------|
|                                                             | n                | Mean    | SD     | n                | Mean    | SD     | n              | Mean    | SD     | n           | Mean    | SD     |
| Demographic                                                 |                  |         |        |                  |         |        |                |         |        |             |         |        |
| Gender                                                      | 80               | F38/M42 |        | 20               | F10/M10 |        | 20             | F10/M10 |        | 40          | F18/M22 |        |
| Age (years)                                                 | 80               | 51.27   | 11.55  | 20               | 50.68   | 11.03  | 20             | 42.38   | 11.04  | 40          | 56.02   | 9.36   |
| Clinical scores                                             |                  |         |        |                  |         |        |                |         |        |             |         |        |
| CAG                                                         | 60               | 42.50   | 2.03   | N/A              | N/A     | N/A    | 20             | 42.00   | 1.62   | 40          | 42.75   | 2.18   |
| DBS                                                         | 60               | 352.80  | 104.30 | N/A              | N/A     | N/A    | 20             | 267.20  | 61.92  | 40          | 395.60  | 94.64  |
| cUHDRS                                                      | 79               | 14.12   | 4.509  | 20               | 17.40   | 1.49   | 20             | 17.98   | 1.10   | 39          | 10.46   | 3.57   |
| TFC                                                         | 80               | 11.20   | 2.62   | 20               | 13.00   | 0.00   | 20             | 13.00   | 0.00   | 40          | 9.40    | 2.70   |
| TMS                                                         | 80               | 20.05   | 22.34  | 20               | 2.35    | 2.43   | 20             | 2.80    | 2.80   | 40          | 37.52   | 19.43  |
| Cognitive tests                                             |                  |         |        |                  |         |        |                |         |        |             |         |        |
| SDMT                                                        | 79               | 40.39   | 17.28  | 20               | 50.90   | 10.38  | 20             | 55.55   | 9.32   | 39          | 27.23   | 12.60  |
| VFC                                                         | 80               | 19.04   | 6.84   | 20               | 24.30   | 4.12   | 20             | 23.30   | 3.42   | 40          | 14.28   | 5.83   |
| SCN                                                         | 80               | 62.10   | 22.01  | 20               | 75.80   | 13.07  | 20             | 81.30   | 10.12  | 40          | 45.65   | 16.90  |
| SWR                                                         | 80               | 81.08   | 29.22  | 20               | 100.20  | 17.36  | 20             | 105.00  | 11.75  | 40          | 59.55   | 23.63  |
| Imaging volumes adjusted for total intracranial volume (mL) |                  |         |        |                  |         |        |                |         |        |             |         |        |
| Whole brain                                                 | 64               | 1121.19 | 156.02 | 15               | 1173.93 | 115.97 | 16             | 1233.56 | 156.20 | 33          | 1042.73 | 128.99 |
| Caudate volume                                              | 63               | 5.26    | 1.80   | 15               | 6.75    | 1.38   | 16             | 6.29    | 1.21   | 32          | 4.05    | 1.35   |
| Grey matter                                                 | 64               | 648.72  | 79.49  | 15               | 705.93  | 51.61  | 16             | 709.01  | 46.38  | 33          | 593.49  | 61.39  |
| White matter                                                | 64               | 407.61  | 41.61  | 15               | 439.59  | 32.64  | 16             | 430.41  | 28.14  | 33          | 382.01  | 34.00  |

Table S2 Associations between outcomes and disease burden score (DBS), clinical and imaging measures for (A) primary, (B) secondary, (C) exploratory and (D) post-hoc outcomes in gene expansion carriers. 3-HK, 3-hydroxykynurenine; AA, Anthranilic acid; CSF, cerebrospinal fluid; cUHDRS, composite Unified Huntington's Disease Rating Scale; KYN, kynurenine; KYNA, kynurenic acid; r, Pearson's partial correlation coefficient; QUIN, quinolinic acid; SCN, Stroop Color Naming; SDMT, Symbol Digit Modalities Test; SWR, Stroop Word Reading; TFC, UHDRS Total Functional Capacity; TMS, UHDRS Total Motor Score; TRP, tryptophan; VFC, Verbal Fluency – Categorical.

**A**

|                 | Age-adjusted |       |                         |         |       | Age and CAG-adjusted |                         |         |       |       |  |
|-----------------|--------------|-------|-------------------------|---------|-------|----------------------|-------------------------|---------|-------|-------|--|
|                 | n            | r     | 95% confidence interval | p-value | n     | r                    | 95% confidence interval | p-value |       |       |  |
| <b>CSF KYNA</b> |              |       |                         |         |       |                      |                         |         |       |       |  |
| DBS             | 60           | 0.14  | -0.12                   | 0.38    | 0.265 | 60                   | 0.01                    | -0.26   | 0.34  | 0.961 |  |
| cUHDRS          | 59           | -0.07 | -0.34                   | 0.19    | 0.616 | 59                   | 0.03                    | -0.24   | 0.27  | 0.829 |  |
| TFC             | 60           | -0.12 | -0.36                   | 0.13    | 0.337 | 60                   | -0.06                   | -0.31   | 0.20  | 0.666 |  |
| TMS             | 60           | 0.07  | -0.18                   | 0.31    | 0.564 | 60                   | -0.02                   | -0.25   | 0.22  | 0.862 |  |
| SDMT            | 59           | -0.01 | -0.27                   | 0.24    | 0.967 | 59                   | 0.10                    | -0.15   | 0.33  | 0.432 |  |
| VFC             | 60           | -0.03 | -0.26                   | 0.20    | 0.833 | 60                   | 0.08                    | -0.15   | 0.30  | 0.509 |  |
| SCN             | 60           | -0.09 | -0.36                   | 0.19    | 0.530 | 60                   | 0.00                    | -0.28   | 0.24  | 0.988 |  |
| SWR             | 60           | -0.10 | -0.37                   | 0.14    | 0.430 | 60                   | -0.02                   | -0.30   | 0.22  | 0.900 |  |
| Whole brain     | 49           | 0.08  | -0.17                   | 0.31    | 0.533 | 49                   | 0.14                    | -0.06   | 0.35  | 0.191 |  |
| Caudate volume  | 48           | 0.08  | -0.16                   | 0.31    | 0.503 | 48                   | 0.16                    | -0.06   | 0.38  | 0.150 |  |
| Grey matter     | 49           | 0.09  | -0.14                   | 0.32    | 0.447 | 49                   | 0.14                    | -0.08   | 0.36  | 0.205 |  |
| White matter    | 49           | -0.04 | -0.34                   | 0.23    | 0.794 | 49                   | -0.01                   | -0.30   | 0.23  | 0.955 |  |
| <b>CSF 3-HK</b> |              |       |                         |         |       |                      |                         |         |       |       |  |
| DBS             | 60           | -0.28 | -0.51                   | 0.01    | 0.033 | 60                   | -0.11                   | -0.45   | 0.16  | 0.476 |  |
| cUHDRS          | 59           | 0.02  | -0.23                   | 0.28    | 0.857 | 59                   | -0.19                   | -0.40   | 0.04  | 0.093 |  |
| TFC             | 60           | 0.05  | -0.18                   | 0.31    | 0.664 | 60                   | -0.10                   | -0.36   | 0.13  | 0.418 |  |
| TMS             | 60           | -0.02 | -0.24                   | 0.21    | 0.851 | 60                   | 0.17                    | -0.04   | 0.37  | 0.105 |  |
| SDMT            | 59           | -0.03 | -0.27                   | 0.24    | 0.834 | 59                   | -0.23                   | -0.42   | -0.01 | 0.031 |  |
| VFC             | 60           | 0.13  | -0.12                   | 0.36    | 0.284 | 60                   | -0.03                   | -0.27   | 0.20  | 0.814 |  |
| SCN             | 60           | -0.05 | -0.31                   | 0.21    | 0.692 | 60                   | -0.27                   | -0.45   | -0.05 | 0.009 |  |
| SWR             | 60           | 0.07  | -0.18                   | 0.35    | 0.607 | 60                   | -0.12                   | -0.35   | 0.11  | 0.301 |  |
| Whole brain     | 49           | 0.02  | -0.27                   | 0.29    | 0.910 | 49                   | -0.12                   | -0.36   | 0.10  | 0.295 |  |
| Caudate volume  | 48           | 0.07  | -0.20                   | 0.35    | 0.618 | 48                   | -0.14                   | -0.34   | 0.11  | 0.238 |  |
| Grey matter     | 49           | -0.05 | -0.31                   | 0.22    | 0.728 | 49                   | -0.17                   | -0.40   | 0.03  | 0.114 |  |
| White matter    | 49           | 0.10  | -0.16                   | 0.35    | 0.441 | 49                   | 0.03                    | -0.21   | 0.25  | 0.779 |  |
| <b>CSF QUIN</b> |              |       |                         |         |       |                      |                         |         |       |       |  |
| DBS             | 60           | -0.02 | -0.29                   | 0.24    | 0.858 | 60                   | -0.16                   | -0.43   | 0.08  | 0.206 |  |
| cUHDRS          | 59           | -0.03 | -0.31                   | 0.25    | 0.832 | 59                   | -0.02                   | -0.32   | 0.23  | 0.865 |  |
| TFC             | 60           | 0.04  | -0.27                   | 0.32    | 0.801 | 60                   | 0.06                    | -0.27   | 0.33  | 0.690 |  |
| TMS             | 60           | 0.01  | -0.23                   | 0.24    | 0.949 | 60                   | -0.01                   | -0.24   | 0.20  | 0.947 |  |
| SDMT            | 59           | -0.14 | -0.41                   | 0.12    | 0.299 | 59                   | -0.16                   | -0.40   | 0.09  | 0.202 |  |
| VFC             | 60           | -0.03 | -0.28                   | 0.24    | 0.822 | 60                   | -0.02                   | -0.27   | 0.22  | 0.881 |  |
| SCN             | 60           | -0.11 | -0.38                   | 0.15    | 0.425 | 60                   | -0.12                   | -0.37   | 0.12  | 0.344 |  |
| SWR             | 60           | 0.00  | -0.30                   | 0.27    | 0.992 | 60                   | 0.02                    | -0.28   | 0.29  | 0.889 |  |
| Whole brain     | 49           | -0.04 | -0.36                   | 0.22    | 0.773 | 49                   | -0.07                   | -0.37   | 0.18  | 0.595 |  |
| Caudate volume  | 48           | 0.15  | -0.12                   | 0.38    | 0.245 | 48                   | 0.11                    | -0.14   | 0.32  | 0.341 |  |
| Grey matter     | 49           | -0.01 | -0.30                   | 0.26    | 0.965 | 49                   | -0.03                   | -0.33   | 0.23  | 0.829 |  |
| White matter    | 49           | 0.01  | -0.29                   | 0.27    | 0.938 | 49                   | 0.00                    | -0.31   | 0.26  | 0.974 |  |

**B**

|                      | Age-adjusted |       |                         |         |        | Age and CAG-adjusted |                         |         |      |       |  |
|----------------------|--------------|-------|-------------------------|---------|--------|----------------------|-------------------------|---------|------|-------|--|
|                      | n            | r     | 95% confidence interval | p-value | n      | r                    | 95% confidence interval | p-value |      |       |  |
| <b>CSF 3-HK:KYNA</b> |              |       |                         |         |        |                      |                         |         |      |       |  |
| DBS                  | 60           | -0.19 | -0.45                   | 0.11    | 0.190  | 60                   | -0.20                   | -0.42   | 0.05 | 0.100 |  |
| cUHDRS               | 59           | 0.04  | -0.25                   | 0.28    | 0.766  | 59                   | -0.07                   | -0.29   | 0.13 | 0.519 |  |
| TFC                  | 60           | -0.01 | -0.24                   | 0.25    | 0.957  | 60                   | -0.09                   | -0.32   | 0.14 | 0.416 |  |
| TMS                  | 60           | -0.02 | -0.24                   | 0.28    | 0.891  | 60                   | 0.08                    | -0.14   | 0.29 | 0.444 |  |
| SDMT                 | 59           | 0.04  | -0.19                   | 0.26    | 0.714  | 59                   | -0.05                   | -0.25   | 0.18 | 0.621 |  |
| VFC                  | 60           | 0.14  | -0.13                   | 0.38    | 0.270  | 60                   | 0.07                    | -0.17   | 0.28 | 0.518 |  |
| SCN                  | 60           | -0.04 | -0.31                   | 0.19    | 0.770  | 60                   | -0.15                   | -0.38   | 0.06 | 0.176 |  |
| SWR                  | 60           | 0.03  | -0.26                   | 0.26    | 0.790  | 60                   | -0.07                   | -0.32   | 0.11 | 0.531 |  |
| Whole brain          | 49           | 0.18  | -0.07                   | 0.42    | 0.136  | 49                   | 0.11                    | -0.11   | 0.30 | 0.321 |  |
| Caudate volume       | 48           | 0.22  | 0.01                    | 0.42    | 0.036  | 48                   | 0.09                    | -0.11   | 0.26 | 0.369 |  |
| Grey matter          | 49           | 0.09  | -0.12                   | 0.32    | 0.431  | 49                   | 0.01                    | -0.20   | 0.19 | 0.884 |  |
| White matter         | 49           | 0.16  | -0.15                   | 0.42    | 0.266  | 49                   | 0.12                    | -0.21   | 0.37 | 0.423 |  |
| <b>CSF KYNA:KYN</b>  |              |       |                         |         |        |                      |                         |         |      |       |  |
| DBS                  | 60           | 0.24  | 0.01                    | 0.46    | 0.039  | 60                   | 0.06                    | -0.25   | 0.31 | 0.692 |  |
| cUHDRS               | 59           | -0.22 | -0.45                   | 0.04    | 0.079  | 59                   | -0.10                   | -0.34   | 0.15 | 0.425 |  |
| TFC                  | 60           | -0.27 | -0.47                   | -0.03   | 0.016  | 60                   | -0.18                   | -0.39   | 0.05 | 0.107 |  |
| TMS                  | 60           | 0.22  | -0.05                   | 0.43    | 0.077  | 60                   | 0.09                    | -0.12   | 0.33 | 0.407 |  |
| SDMT                 | 59           | -0.18 | -0.41                   | 0.06    | 0.127  | 59                   | -0.06                   | -0.30   | 0.19 | 0.654 |  |
| VFC                  | 60           | -0.25 | -0.46                   | 0.01    | 0.038  | 60                   | -0.14                   | -0.36   | 0.11 | 0.243 |  |
| SCN                  | 60           | -0.24 | -0.48                   | 0.04    | 0.066  | 60                   | -0.13                   | -0.41   | 0.14 | 0.379 |  |
| SWR                  | 60           | -0.22 | -0.47                   | 0.03    | 0.093  | 60                   | -0.10                   | -0.38   | 0.14 | 0.472 |  |
| Whole brain          | 49           | -0.12 | -0.39                   | 0.15    | 0.382  | 49                   | -0.06                   | -0.27   | 0.20 | 0.637 |  |
| Caudate volume       | 48           | 0.06  | -0.18                   | 0.27    | 0.584  | 48                   | 0.18                    | -0.11   | 0.40 | 0.173 |  |
| Grey matter          | 49           | -0.06 | -0.29                   | 0.20    | 0.628  | 49                   | 0.00                    | -0.20   | 0.17 | 0.992 |  |
| White matter         | 49           | -0.20 | -0.47                   | 0.08    | 0.158  | 49                   | -0.16                   | -0.42   | 0.11 | 0.234 |  |
| <b>CSF 3-HK:KYN</b>  |              |       |                         |         |        |                      |                         |         |      |       |  |
| DBS                  | 60           | -0.41 | -0.61                   | -0.16   | <0.001 | 60                   | -0.23                   | -0.45   | 0.02 | 0.058 |  |
| cUHDRS               | 59           | 0.19  | -0.08                   | 0.42    | 0.139  | 59                   | -0.05                   | -0.30   | 0.22 | 0.728 |  |
| TFC                  | 60           | 0.18  | -0.07                   | 0.39    | 0.127  | 60                   | -0.02                   | -0.27   | 0.20 | 0.897 |  |
| TMS                  | 60           | -0.17 | -0.39                   | 0.13    | 0.180  | 60                   | 0.06                    | -0.19   | 0.31 | 0.637 |  |
| SDMT                 | 59           | 0.20  | -0.05                   | 0.41    | 0.093  | 59                   | -0.01                   | -0.26   | 0.30 | 0.931 |  |
| VFC                  | 60           | 0.38  | 0.13                    | 0.57    | 0.001  | 60                   | 0.21                    | -0.03   | 0.43 | 0.072 |  |
| SCN                  | 60           | 0.12  | -0.15                   | 0.34    | 0.330  | 60                   | -0.13                   | -0.38   | 0.09 | 0.272 |  |
| SWR                  | 60           | 0.20  | -0.08                   | 0.42    | 0.115  | 60                   | -0.03                   | -0.27   | 0.21 | 0.777 |  |
| Whole brain          | 49           | 0.24  | -0.10                   | 0.48    | 0.094  | 49                   | 0.11                    | -0.13   | 0.37 | 0.393 |  |
| Caudate volume       | 48           | 0.13  | -0.11                   | 0.37    | 0.289  | 48                   | -0.12                   | -0.31   | 0.09 | 0.254 |  |
| Grey matter          | 49           | 0.07  | -0.23                   | 0.35    | 0.629  | 49                   | -0.06                   | -0.26   | 0.20 | 0.575 |  |
| White matter         | 49           | 0.31  | -0.02                   | 0.55    | 0.031  | 49                   | 0.25                    | -0.05   | 0.54 | 0.096 |  |

**C**

|                | Age-adjusted |       |                         |         |       | Age and CAG-adjusted |                         |         |       |       |  |
|----------------|--------------|-------|-------------------------|---------|-------|----------------------|-------------------------|---------|-------|-------|--|
|                | n            | r     | 95% confidence interval | p-value | n     | r                    | 95% confidence interval | p-value |       |       |  |
| <b>CSF TRP</b> |              |       |                         |         |       |                      |                         |         |       |       |  |
| DBS            | 60           | -0.10 | -0.35                   | 0.14    | 0.428 | 60                   | -0.13                   | -0.37   | 0.05  | 0.203 |  |
| cUHDRS         | 59           | 0.19  | -0.09                   | 0.45    | 0.167 | 59                   | 0.21                    | -0.06   | 0.43  | 0.104 |  |
| TFC            | 60           | 0.27  | 0.05                    | 0.47    | 0.010 | 60                   | 0.28                    | 0.07    | 0.47  | 0.006 |  |
| TMS            | 60           | -0.20 | -0.47                   | 0.08    | 0.143 | 60                   | -0.21                   | -0.45   | 0.08  | 0.106 |  |
| SDMT           | 59           | 0.18  | -0.14                   | 0.45    | 0.234 | 59                   | 0.18                    | -0.11   | 0.43  | 0.189 |  |
| VFC            | 60           | 0.29  | 0.06                    | 0.46    | 0.004 | 60                   | 0.32                    | 0.10    | 0.47  | 0.001 |  |
| SCN            | 60           | 0.07  | -0.22                   | 0.29    | 0.595 | 60                   | 0.04                    | -0.23   | 0.27  | 0.766 |  |
| SWR            | 60           | 0.11  | -0.15                   | 0.31    | 0.376 | 60                   | 0.09                    | -0.17   | 0.28  | 0.439 |  |
| Whole brain    | 49           | 0.14  | -0.21                   | 0.41    | 0.384 | 49                   | 0.10                    | -0.23   | 0.40  | 0.520 |  |
| Caudate volume | 48           | 0.13  | -0.20                   | 0.41    | 0.409 | 48                   | 0.08                    | -0.25   | 0.38  | 0.630 |  |
| Grey matter    | 49           | 0.18  | -0.16                   | 0.52    | 0.295 | 49                   | 0.16                    | -0.21   | 0.48  | 0.389 |  |
| White matter   | 49           | 0.07  | -0.19                   | 0.30    | 0.593 | 49                   | 0.05                    | -0.21   | 0.29  | 0.716 |  |
| <b>CSF KYN</b> |              |       |                         |         |       |                      |                         |         |       |       |  |
| DBS            | 60           | 0.05  | -0.19                   | 0.28    | 0.669 | 60                   | 0.02                    | -0.27   | 0.25  | 0.878 |  |
| cUHDRS         | 59           | -0.14 | -0.37                   | 0.12    | 0.264 | 59                   | -0.15                   | -0.36   | 0.09  | 0.217 |  |
| TFC            | 60           | -0.12 | -0.37                   | 0.15    | 0.360 | 60                   | -0.11                   | -0.37   | 0.17  | 0.411 |  |
| TMS            | 60           | 0.13  | -0.11                   | 0.35    | 0.260 | 60                   | 0.13                    | -0.11   | 0.32  | 0.247 |  |
| SDMT           | 59           | -0.19 | -0.42                   | 0.09    | 0.162 | 59                   | -0.20                   | -0.41   | 0.04  | 0.098 |  |
| VFC            | 60           | -0.23 | -0.41                   | -0.01   | 0.027 | 60                   | -0.25                   | -0.43   | -0.03 | 0.017 |  |
| SCN            | 60           | -0.13 | -0.37                   | 0.07    | 0.270 | 60                   | -0.12                   | -0.34   | 0.05  | 0.230 |  |
| SWR            | 60           | -0.08 | -0.32                   | 0.15    | 0.530 | 60                   | -0.06                   | -0.29   | 0.15  | 0.600 |  |
| Whole brain    | 49           | -0.22 | -0.48                   | 0.02    | 0.079 | 49                   | -0.24                   | -0.48   | 0.00  | 0.046 |  |
| Caudate volume | 48           | -0.04 | -0.28                   | 0.20    | 0.763 | 48                   | -0.05                   | -0.26   | 0.18  | 0.663 |  |
| Grey matter    | 49           | -0.18 | -0.43                   | 0.07    | 0.183 | 49                   | -0.19                   | -0.45   | 0.08  | 0.158 |  |
| White matter   | 49           | -0.15 | -0.39                   | 0.09    | 0.209 | 49                   | -0.16                   | -0.38   | 0.08  | 0.174 |  |
| <b>CSF AA</b>  |              |       |                         |         |       |                      |                         |         |       |       |  |
| DBS            | 60           | -0.17 | -0.38                   | 0.09    | 0.158 | 60                   | -0.16                   | -0.38   | 0.12  | 0.211 |  |
| cUHDRS         | 59           | 0.12  | -0.15                   | 0.38    | 0.395 | 59                   | 0.04                    | -0.22   | 0.31  | 0.768 |  |
| TFC            | 60           | 0.05  | -0.24                   | 0.35    | 0.742 | 60                   | -0.02                   | -0.34   | 0.25  | 0.896 |  |
| TMS            | 60           | -0.07 | -0.34                   | 0.18    | 0.596 | 60                   | 0.01                    | -0.24   | 0.25  | 0.957 |  |
| SDMT           | 59           | 0.14  | -0.08                   | 0.39    | 0.238 | 59                   | 0.08                    | -0.14   | 0.32  | 0.508 |  |
| VFC            | 60           | 0.20  | -0.03                   | 0.42    | 0.088 | 60                   | 0.15                    | -0.06   | 0.35  | 0.140 |  |
| SCN            | 60           | 0.10  | -0.15                   | 0.37    | 0.469 | 60                   | 0.03                    | -0.22   | 0.27  | 0.846 |  |
| SWR            | 60           | 0.08  | -0.19                   | 0.34    | 0.543 | 60                   | 0.00                    | -0.24   | 0.28  | 0.981 |  |
| Whole brain    | 49           | 0.16  | -0.10                   | 0.41    | 0.221 | 49                   | 0.10                    | -0.14   | 0.35  | 0.426 |  |
| Caudate volume | 48           | 0.05  | -0.22                   | 0.29    | 0.722 | 48                   | -0.07                   | -0.27   | 0.16  | 0.531 |  |
| Grey matter    | 49           | 0.13  | -0.13                   | 0.43    | 0.384 | 49                   | 0.07                    | -0.19   | 0.35  | 0.598 |  |
| White matter   | 49           | 0.10  | -0.15                   | 0.35    | 0.448 | 49                   | 0.06                    | -0.19   | 0.29  | 0.623 |  |

|                    | Age-adjusted |       |                         |         |       | Age and CAG-adjusted |                         |         |       |        |
|--------------------|--------------|-------|-------------------------|---------|-------|----------------------|-------------------------|---------|-------|--------|
|                    | n            | r     | 95% confidence interval | p-value | n     | r                    | 95% confidence interval | p-value |       |        |
| <b>Plasma TRP</b>  |              |       |                         |         |       |                      |                         |         |       |        |
| DBS                | 58           | -0.27 | -0.45                   | -0.08   | 0.003 | 58                   | -0.09                   | -0.29   | 0.15  | 0.421  |
| cUHDRS             | 57           | 0.23  | -0.04                   | 0.45    | 0.064 | 57                   | 0.10                    | -0.21   | 0.34  | 0.461  |
| TFC                | 58           | 0.19  | -0.07                   | 0.38    | 0.102 | 58                   | 0.05                    | -0.20   | 0.27  | 0.665  |
| TMS                | 58           | -0.30 | -0.54                   | -0.03   | 0.022 | 58                   | -0.18                   | -0.45   | 0.14  | 0.221  |
| SDMT               | 57           | 0.24  | -0.04                   | 0.45    | 0.053 | 57                   | 0.12                    | -0.12   | 0.34  | 0.307  |
| VFC                | 58           | 0.30  | 0.01                    | 0.46    | 0.005 | 58                   | 0.19                    | -0.14   | 0.36  | 0.102  |
| SCN                | 58           | 0.17  | -0.13                   | 0.39    | 0.197 | 58                   | 0.02                    | -0.31   | 0.26  | 0.897  |
| SWR                | 58           | 0.20  | -0.08                   | 0.41    | 0.087 | 58                   | 0.06                    | -0.24   | 0.28  | 0.642  |
| Whole brain        | 47           | 0.20  | -0.06                   | 0.47    | 0.140 | 47                   | 0.12                    | -0.21   | 0.38  | 0.419  |
| Caudate volume     | 46           | 0.10  | -0.28                   | 0.42    | 0.580 | 46                   | -0.04                   | -0.46   | 0.30  | 0.836  |
| Grey matter        | 47           | 0.19  | -0.06                   | 0.44    | 0.146 | 47                   | 0.12                    | -0.20   | 0.36  | 0.409  |
| White matter       | 47           | 0.16  | -0.07                   | 0.39    | 0.159 | 47                   | 0.12                    | -0.14   | 0.33  | 0.305  |
| <b>Plasma KYN</b>  |              |       |                         |         |       |                      |                         |         |       |        |
| DBS                | 58           | 0.02  | -0.26                   | 0.33    | 0.909 | 58                   | 0.06                    | -0.24   | 0.37  | 0.722  |
| cUHDRS             | 57           | 0.06  | -0.22                   | 0.34    | 0.700 | 57                   | 0.07                    | -0.16   | 0.32  | 0.566  |
| TFC                | 58           | -0.04 | -0.33                   | 0.28    | 0.817 | 58                   | -0.04                   | -0.33   | 0.26  | 0.764  |
| TMS                | 58           | -0.08 | -0.36                   | 0.20    | 0.585 | 58                   | -0.10                   | -0.34   | 0.13  | 0.408  |
| SDMT               | 57           | 0.12  | -0.13                   | 0.39    | 0.365 | 57                   | 0.15                    | -0.10   | 0.37  | 0.207  |
| VFC                | 58           | 0.05  | -0.20                   | 0.29    | 0.670 | 58                   | 0.07                    | -0.14   | 0.26  | 0.508  |
| SCN                | 58           | 0.01  | -0.25                   | 0.23    | 0.961 | 58                   | 0.01                    | -0.21   | 0.22  | 0.934  |
| SWR                | 58           | -0.03 | -0.26                   | 0.20    | 0.776 | 58                   | -0.04                   | -0.22   | 0.15  | 0.655  |
| Whole brain        | 47           | 0.04  | -0.31                   | 0.36    | 0.814 | 47                   | 0.03                    | -0.25   | 0.32  | 0.820  |
| Caudate volume     | 46           | -0.02 | -0.32                   | 0.26    | 0.913 | 46                   | -0.03                   | -0.31   | 0.20  | 0.811  |
| Grey matter        | 47           | 0.08  | -0.22                   | 0.43    | 0.630 | 47                   | 0.08                    | -0.19   | 0.41  | 0.620  |
| White matter       | 47           | -0.01 | -0.32                   | 0.22    | 0.921 | 47                   | -0.02                   | -0.30   | 0.23  | 0.890  |
| <b>Plasma KYNA</b> |              |       |                         |         |       |                      |                         |         |       |        |
| DBS                | 51           | -0.03 | -0.29                   | 0.24    | 0.830 | 51                   | -0.04                   | -0.31   | 0.35  | 0.826  |
| cUHDRS             | 50           | 0.27  | 0.00                    | 0.53    | 0.050 | 50                   | 0.37                    | 0.12    | 0.54  | <0.001 |
| TFC                | 51           | 0.28  | -0.01                   | 0.54    | 0.040 | 51                   | 0.34                    | 0.03    | 0.56  | 0.009  |
| TMS                | 51           | -0.31 | -0.53                   | -0.01   | 0.022 | 51                   | -0.38                   | -0.55   | -0.13 | <0.001 |
| SDMT               | 50           | 0.29  | 0.02                    | 0.56    | 0.037 | 50                   | 0.37                    | 0.18    | 0.56  | <0.001 |
| VFC                | 51           | 0.21  | -0.04                   | 0.44    | 0.096 | 51                   | 0.24                    | 0.01    | 0.42  | 0.019  |
| SCN                | 51           | 0.14  | -0.12                   | 0.42    | 0.306 | 51                   | 0.16                    | -0.08   | 0.36  | 0.157  |
| SWR                | 51           | 0.21  | -0.06                   | 0.45    | 0.108 | 51                   | 0.26                    | 0.04    | 0.45  | 0.010  |
| Whole brain        | 40           | 0.10  | -0.26                   | 0.37    | 0.522 | 40                   | 0.09                    | -0.26   | 0.36  | 0.544  |
| Caudate volume     | 39           | 0.20  | -0.11                   | 0.46    | 0.172 | 39                   | 0.21                    | -0.04   | 0.43  | 0.094  |
| Grey matter        | 40           | 0.12  | -0.22                   | 0.44    | 0.475 | 40                   | 0.12                    | -0.22   | 0.40  | 0.458  |
| White matter       | 40           | 0.02  | -0.27                   | 0.27    | 0.910 | 40                   | 0.01                    | -0.30   | 0.25  | 0.947  |

|                    | Age-adjusted |       |                         |         |       | Age and CAG-adjusted |                         |         |      |       |
|--------------------|--------------|-------|-------------------------|---------|-------|----------------------|-------------------------|---------|------|-------|
|                    | n            | r     | 95% confidence interval | p-value | n     | r                    | 95% confidence interval | p-value |      |       |
| <b>Plasma 3-HK</b> |              |       |                         |         |       |                      |                         |         |      |       |
| DBS                | 58           | 0.19  | -0.07                   | 0.41    | 0.124 | 58                   | 0.04                    | -0.21   | 0.24 | 0.753 |
| cUHDRS             | 57           | -0.01 | -0.28                   | 0.28    | 0.971 | 57                   | 0.15                    | -0.09   | 0.40 | 0.242 |
| TFC                | 58           | -0.04 | -0.33                   | 0.27    | 0.799 | 58                   | 0.08                    | -0.22   | 0.37 | 0.575 |
| TMS                | 58           | 0.02  | -0.25                   | 0.28    | 0.887 | 58                   | -0.13                   | -0.36   | 0.10 | 0.272 |
| SDMT               | 57           | 0.01  | -0.30                   | 0.30    | 0.958 | 57                   | 0.14                    | -0.12   | 0.41 | 0.285 |
| VFC                | 58           | -0.03 | -0.26                   | 0.23    | 0.830 | 58                   | 0.11                    | -0.09   | 0.31 | 0.267 |
| SCN                | 58           | -0.06 | -0.31                   | 0.23    | 0.655 | 58                   | 0.07                    | -0.16   | 0.29 | 0.565 |
| SWR                | 58           | -0.09 | -0.31                   | 0.18    | 0.494 | 58                   | 0.04                    | -0.16   | 0.25 | 0.682 |
| Whole brain        | 47           | 0.00  | -0.31                   | 0.29    | 0.975 | 47                   | 0.05                    | -0.21   | 0.35 | 0.723 |
| Caudate volume     | 46           | 0.03  | -0.30                   | 0.29    | 0.844 | 46                   | 0.11                    | -0.17   | 0.41 | 0.459 |
| Grey matter        | 47           | 0.02  | -0.27                   | 0.30    | 0.875 | 47                   | 0.06                    | -0.22   | 0.37 | 0.662 |
| White matter       | 47           | -0.08 | -0.35                   | 0.21    | 0.592 | 47                   | -0.05                   | -0.33   | 0.20 | 0.684 |
| <b>Plasma AA</b>   |              |       |                         |         |       |                      |                         |         |      |       |
| DBS                | 53           | 0.11  | -0.20                   | 0.36    | 0.428 | 53                   | 0.06                    | -0.18   | 0.29 | 0.610 |
| cUHDRS             | 52           | -0.12 | -0.36                   | 0.13    | 0.337 | 52                   | -0.05                   | -0.27   | 0.18 | 0.670 |
| TFC                | 53           | -0.05 | -0.32                   | 0.26    | 0.750 | 53                   | 0.01                    | -0.24   | 0.32 | 0.963 |
| TMS                | 53           | -0.05 | -0.35                   | 0.22    | 0.738 | 53                   | -0.13                   | -0.40   | 0.10 | 0.318 |
| SDMT               | 52           | -0.11 | -0.35                   | 0.14    | 0.389 | 52                   | -0.04                   | -0.28   | 0.18 | 0.722 |
| VFC                | 53           | -0.12 | -0.39                   | 0.17    | 0.404 | 53                   | -0.08                   | -0.32   | 0.17 | 0.556 |
| SCN                | 53           | -0.08 | -0.32                   | 0.20    | 0.553 | 53                   | -0.02                   | -0.26   | 0.24 | 0.844 |
| SWR                | 53           | -0.08 | -0.33                   | 0.22    | 0.577 | 53                   | -0.02                   | -0.26   | 0.23 | 0.845 |
| Whole brain        | 44           | -0.07 | -0.34                   | 0.22    | 0.653 | 44                   | 0.01                    | -0.26   | 0.22 | 0.957 |
| Caudate volume     | 43           | 0.03  | -0.21                   | 0.26    | 0.830 | 43                   | 0.16                    | -0.07   | 0.37 | 0.163 |
| Grey matter        | 44           | 0.00  | -0.29                   | 0.28    | 0.993 | 44                   | 0.06                    | -0.20   | 0.29 | 0.619 |
| White matter       | 44           | -0.18 | -0.45                   | 0.07    | 0.185 | 44                   | -0.15                   | -0.40   | 0.09 | 0.250 |
| <b>Plasma QUIN</b> |              |       |                         |         |       |                      |                         |         |      |       |
| DBS                | 57           | -0.02 | -0.26                   | 0.28    | 0.897 | 57                   | 0.09                    | -0.13   | 0.35 | 0.463 |
| cUHDRS             | 56           | 0.11  | -0.20                   | 0.38    | 0.450 | 56                   | 0.11                    | -0.17   | 0.40 | 0.454 |
| TFC                | 57           | 0.02  | -0.28                   | 0.31    | 0.873 | 57                   | 0.00                    | -0.29   | 0.27 | 0.995 |
| TMS                | 57           | -0.10 | -0.33                   | 0.15    | 0.427 | 57                   | -0.09                   | -0.31   | 0.15 | 0.464 |
| SDMT               | 56           | 0.22  | -0.05                   | 0.46    | 0.096 | 56                   | 0.24                    | -0.06   | 0.49 | 0.087 |
| VFC                | 57           | 0.09  | -0.18                   | 0.31    | 0.470 | 57                   | 0.08                    | -0.15   | 0.32 | 0.506 |
| SCN                | 57           | 0.09  | -0.17                   | 0.40    | 0.552 | 57                   | 0.07                    | -0.20   | 0.41 | 0.639 |
| SWR                | 57           | 0.07  | -0.21                   | 0.39    | 0.665 | 57                   | 0.05                    | -0.25   | 0.37 | 0.766 |
| Whole brain        | 47           | -0.03 | -0.33                   | 0.29    | 0.865 | 47                   | -0.03                   | -0.29   | 0.28 | 0.810 |
| Caudate volume     | 46           | -0.01 | -0.25                   | 0.27    | 0.963 | 46                   | -0.02                   | -0.23   | 0.21 | 0.891 |
| Grey matter        | 47           | 0.05  | -0.24                   | 0.37    | 0.742 | 47                   | 0.05                    | -0.23   | 0.34 | 0.753 |
| White matter       | 47           | -0.12 | -0.38                   | 0.25    | 0.441 | 47                   | -0.13                   | -0.39   | 0.23 | 0.415 |

**D**

|                    |                | Age-adjusted |       |                         |         | Age and CAG-adjusted |    |                         |         |      |       |
|--------------------|----------------|--------------|-------|-------------------------|---------|----------------------|----|-------------------------|---------|------|-------|
|                    |                | n            | r     | 95% confidence interval | p-value | n                    | r  | 95% confidence interval | p-value |      |       |
| <b>CSF KYN:TRP</b> |                |              |       |                         |         |                      |    |                         |         |      |       |
|                    | DBS            | 60           | -0.01 | -0.25                   | 0.23    | 0.965                | 60 | 0.01                    | -0.24   | 0.26 | 0.936 |
|                    | cUHDRS         | 59           | 0.03  | -0.24                   | 0.27    | 0.805                | 59 | 0.03                    | -0.21   | 0.26 | 0.782 |
|                    | TFC            | 60           | -0.05 | -0.35                   | 0.17    | 0.692                | 60 | -0.07                   | -0.38   | 0.18 | 0.641 |
|                    | TMS            | 60           | -0.01 | -0.23                   | 0.23    | 0.951                | 60 | 0.00                    | -0.24   | 0.23 | 0.983 |
|                    | SDMT           | 59           | 0.10  | -0.12                   | 0.32    | 0.378                | 59 | 0.12                    | -0.10   | 0.36 | 0.292 |
|                    | VFC            | 60           | 0.10  | -0.12                   | 0.29    | 0.358                | 60 | 0.11                    | -0.13   | 0.31 | 0.303 |
|                    | SCN            | 60           | 0.13  | -0.07                   | 0.36    | 0.240                | 60 | 0.16                    | -0.05   | 0.37 | 0.157 |
|                    | SWR            | 60           | 0.04  | -0.21                   | 0.28    | 0.764                | 60 | 0.04                    | -0.19   | 0.32 | 0.752 |
|                    | Whole brain    | 49           | 0.21  | -0.02                   | 0.42    | 0.061                | 49 | 0.24                    | -0.02   | 0.46 | 0.048 |
|                    | Caudate volume | 48           | -0.03 | -0.23                   | 0.19    | 0.755                | 48 | -0.01                   | -0.21   | 0.22 | 0.959 |
|                    | Grey matter    | 49           | 0.12  | -0.12                   | 0.35    | 0.338                | 49 | 0.14                    | -0.14   | 0.39 | 0.325 |
|                    | White matter   | 49           | 0.15  | -0.11                   | 0.37    | 0.239                | 49 | 0.16                    | -0.08   | 0.40 | 0.194 |



Table S3 Within-subject short-term stability for primary, secondary, exploratory and post-hoc outcomes. 3-HK, 3-hydroxykynurenine; AA, Anthranilic acid; CSF, cerebrospinal fluid; ICC, KYN, kynurenine; KYNA, kynurenic acid; QUIN, quinolinic acid; TRP, tryptophan.

|                                     | ICC   | 95% confidence interval |      |
|-------------------------------------|-------|-------------------------|------|
| <b>Primary Outcomes</b>             |       |                         |      |
| CSF KYNA                            | 0.84  | 0.58                    | 0.94 |
| CSF 3-HK                            | 0.68  | 0.27                    | 0.88 |
| CSF QUIN                            | 0.90  | 0.72                    | 0.96 |
| <b>Secondary Outcomes</b>           |       |                         |      |
| CSF 3-HK:KYNA                       | 0.78  | 0.46                    | 0.92 |
| CSF KYNA:KYN                        | 0.43  | -0.09                   | 0.76 |
| CSF 3-HK:KYN                        | 0.78  | 0.47                    | 0.92 |
| <b>Exploratory Outcomes</b>         |       |                         |      |
| CSF TRP                             | 0.58  | 0.11                    | 0.83 |
| CSF KYN                             | 0.67  | 0.25                    | 0.87 |
| CSF AA                              | 0.84  | 0.58                    | 0.94 |
| Plasma TRP                          | 0.58  | 0.09                    | 0.84 |
| Plasma KYN                          | 0.54  | 0.03                    | 0.82 |
| Plasma KYNA                         | -0.16 | -0.68                   | 0.45 |
| Plasma 3-HK                         | 0.57  | 0.08                    | 0.84 |
| Plasma AA                           | 0.80  | 0.41                    | 0.94 |
| Plasma QUIN                         | 0.89  | 0.69                    | 0.96 |
| <b>Post-hoc Exploratory Outcome</b> |       |                         |      |
| CSF KYN:TRP                         | 0.57  | 0.10                    | 0.83 |

Table S4 Associations and ratios between CSF and plasma. 3-HK, 3-hydroxykynurenine; AA, Anthranilic acid, KYN, kynurenine; KYNA, kynurenic acid; QUIN, quinolinic acid; r, Pearson's partial correlation coefficient; TRP, tryptophan.

|      | n  | r     | 95% confidence interval |       | p-value | CSF to plasma ratio                     |
|------|----|-------|-------------------------|-------|---------|-----------------------------------------|
| TRP  | 78 | 0.43  | 0.21                    | 0.60  | <0.001  | 0.04 $\mu\text{M}/\mu\text{M}$          |
| KYN  | 78 | -0.55 | -0.70                   | -0.36 | <0.001  | 23.43 nM/ $\mu\text{M}$ = 0.02343 nM/nM |
| KYNA | 70 | 0.17  | -0.13                   | 0.43  | 0.229   | 0.06 nM/nM                              |
| 3-HK | 77 | -0.42 | -0.57                   | -0.22 | <0.001  | 0.11 nM/nM                              |
| AA   | 71 | -0.48 | -0.63                   | -0.29 | <0.001  | 0.31 nM/nM                              |
| QUIN | 77 | -0.75 | -0.83                   | -0.66 | <0.001  | 0.06 nM/nM                              |

## Supplementary figures

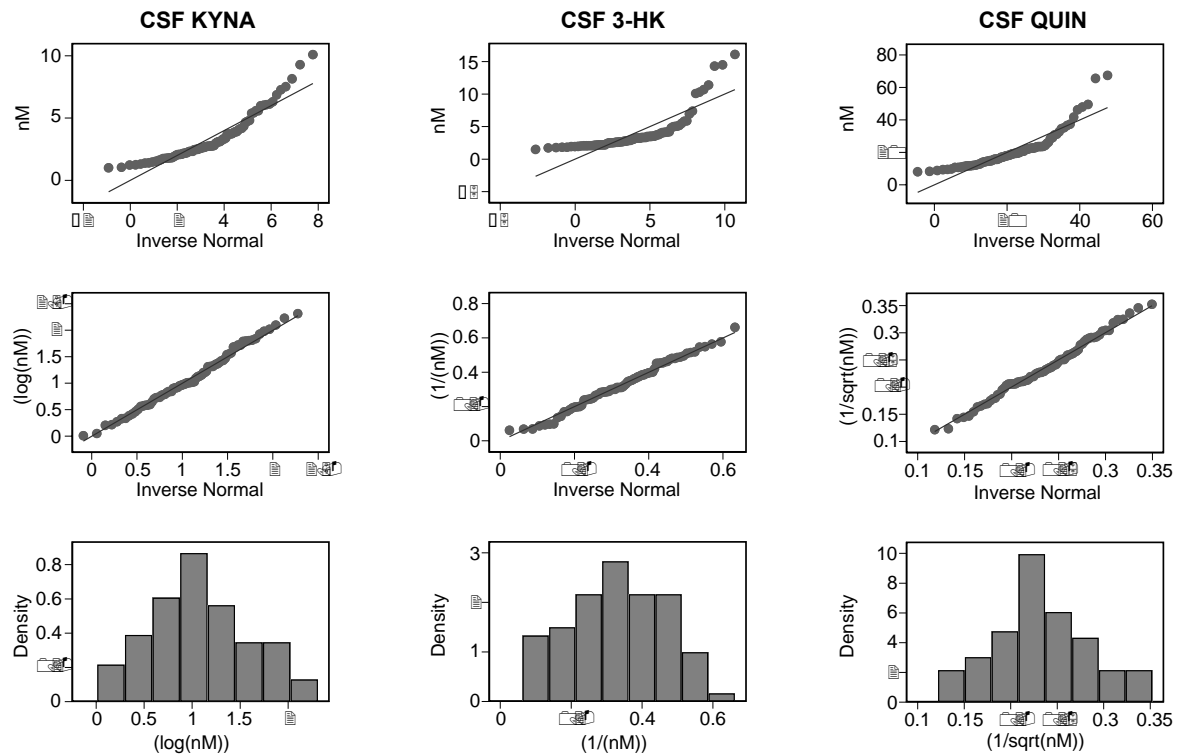

Figure S1 Distributions and arithmetic operations used to transform primary outcomes: cerebrospinal fluid (CSF) kynurenic acid (KYNA), CSF 3-hydroxykynurenine (3-HK) and CSF quinolinic acid (QUIN). Top row depicts a quantile-quantile plot for observed distribution against normal distribution, middle row shows a quantile-quantile plot for transformed distribution against normal distribution, and the bottom row a histogram for transformed distribution.

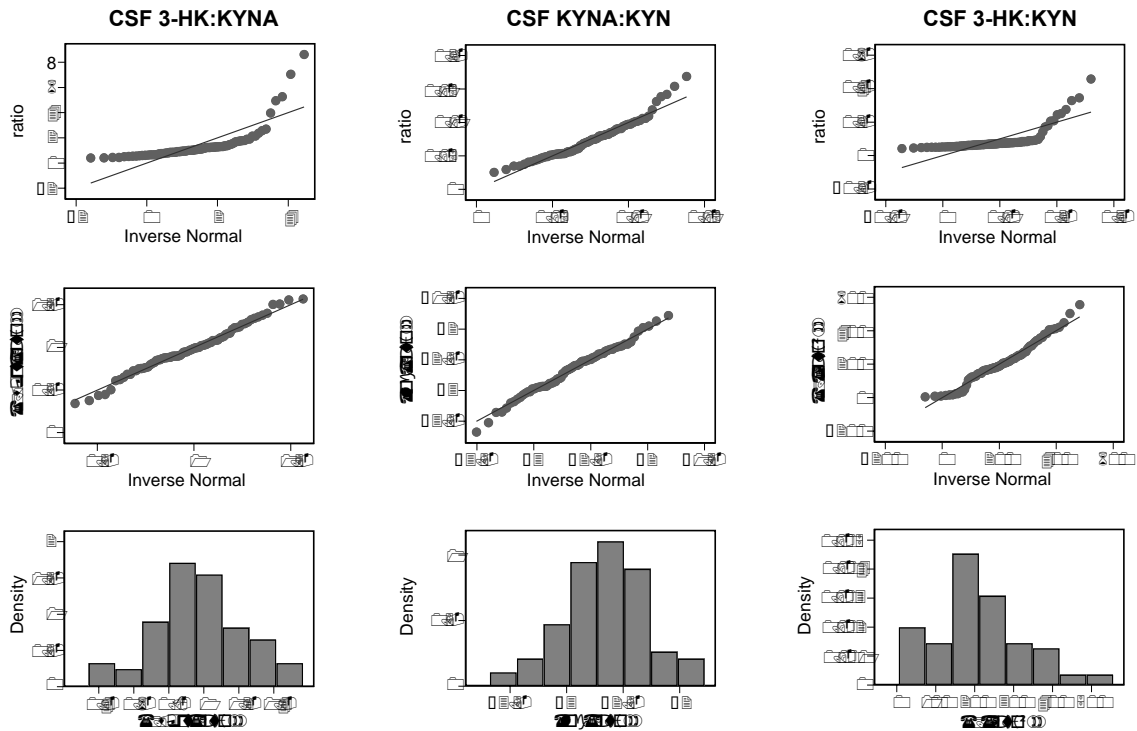

Figure S2 Distributions and arithmetic operations used to transform secondary outcomes: ratios of cerebrospinal fluid (CSF) 3-hydroxykynurenine to kynurenic acid (3-HK:KYNA), CSF kynurenic acid to kynurenine (KYNA:KYN) and CSF 3-hydroxykynurenine to kynurenine (3-HK:KYN). Top row depicts a quantile-quantile plot for observed distribution against normal distribution, middle row shows a quantile-quantile plot for transformed distribution against normal distribution, and the bottom row a histogram for transformed distribution.

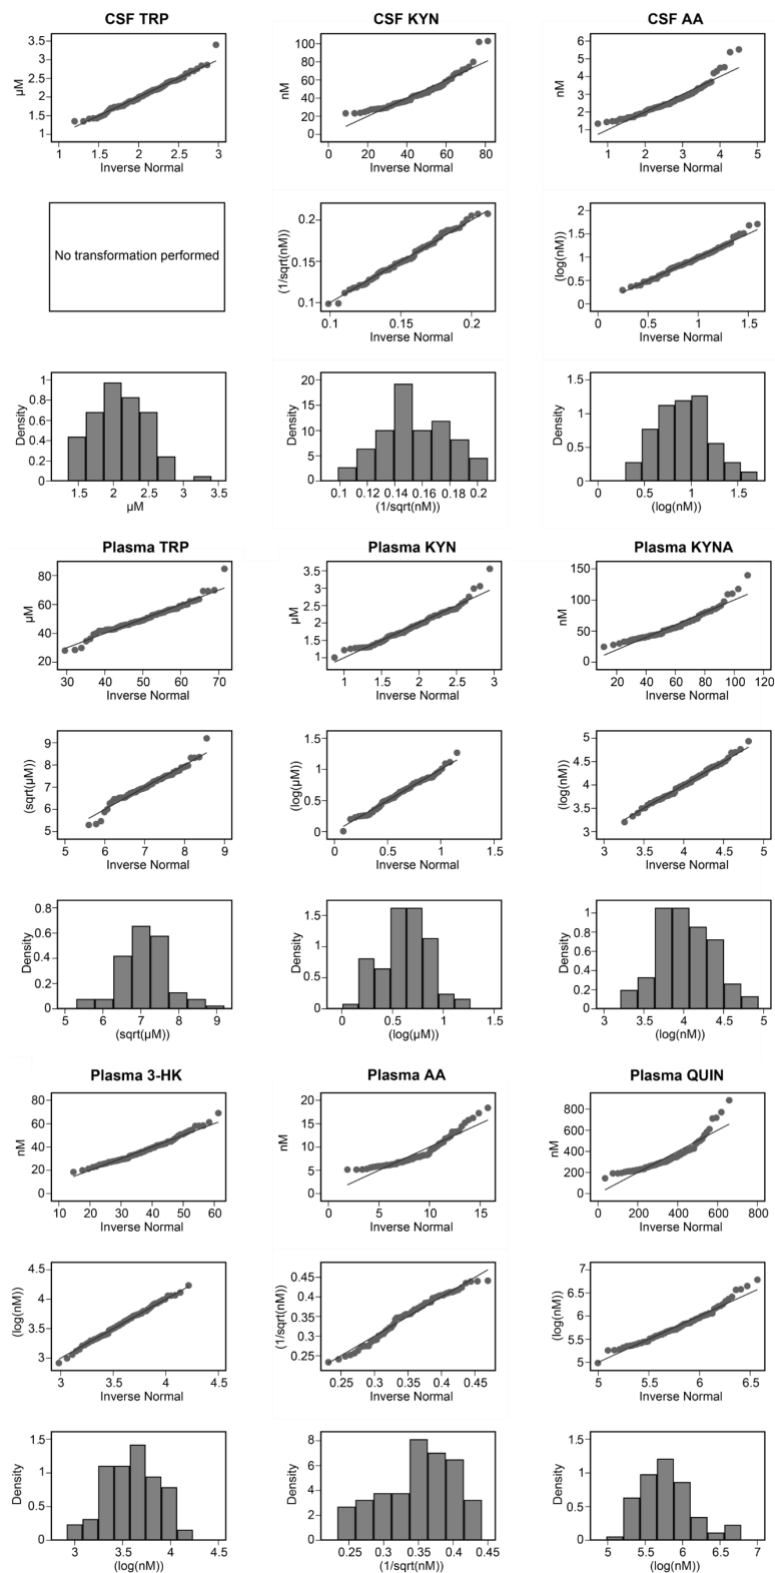

Figure S3 Distributions and arithmetic operations used to transform exploratory outcomes: cerebrospinal fluid (CSF) tryptophan (TRP), CSF kynurenine (KYN), CSF anthranilic acid (AA), plasma TRP, plasma KYN, plasma KYNA, plasma 3-hydroxykynurenine (3-HK), plasma AA, and plasma quinolinic acid (QUIN). In each of the three 3 by 3 subpanels, top row depicts a quantile-quantile plot for observed distribution against normal distribution, middle row shows a quantile-quantile plot for transformed distribution against normal distribution, and the bottom row a histogram for transformed distribution.

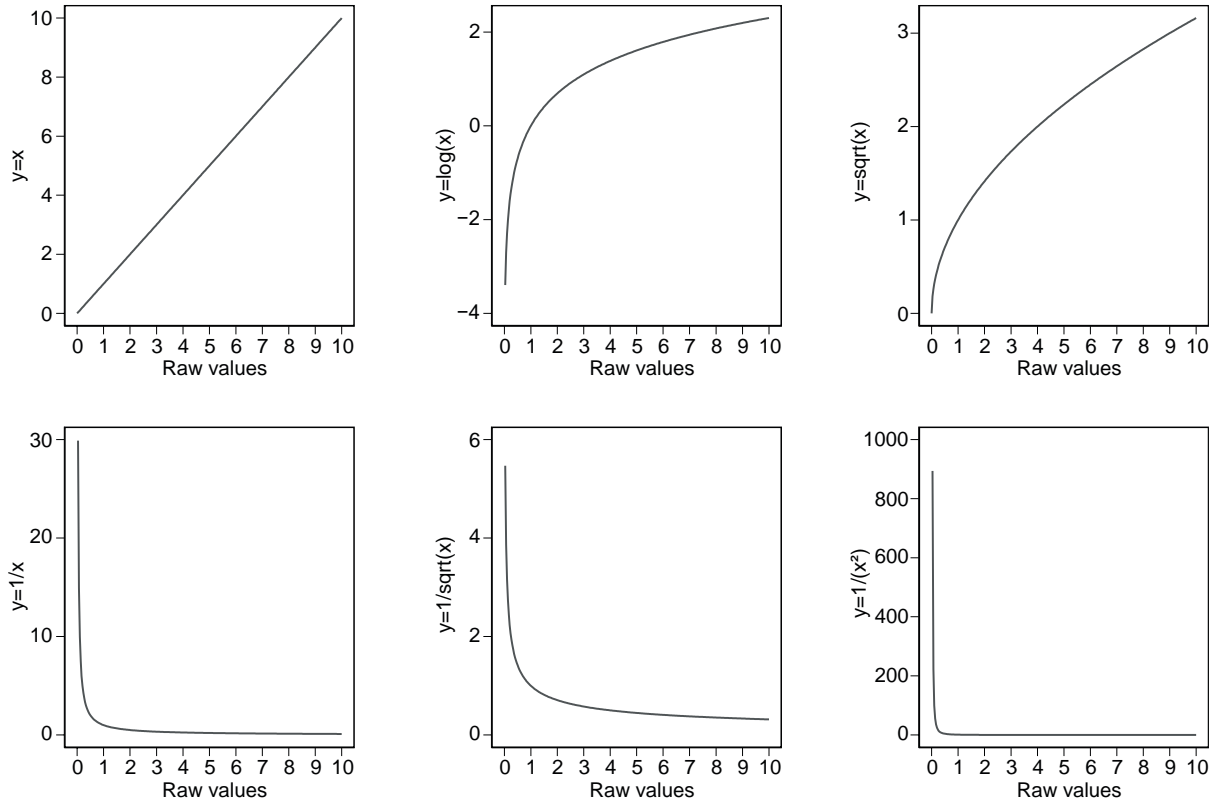

Figure S4 Arithmetic transformations applied to outcomes of interest. Note that for outcomes where a transformation includes a reciprocal (i.e.  $1/x$ ), an increase in the raw measurement corresponds to a decrease in the transformed value and vice-versa

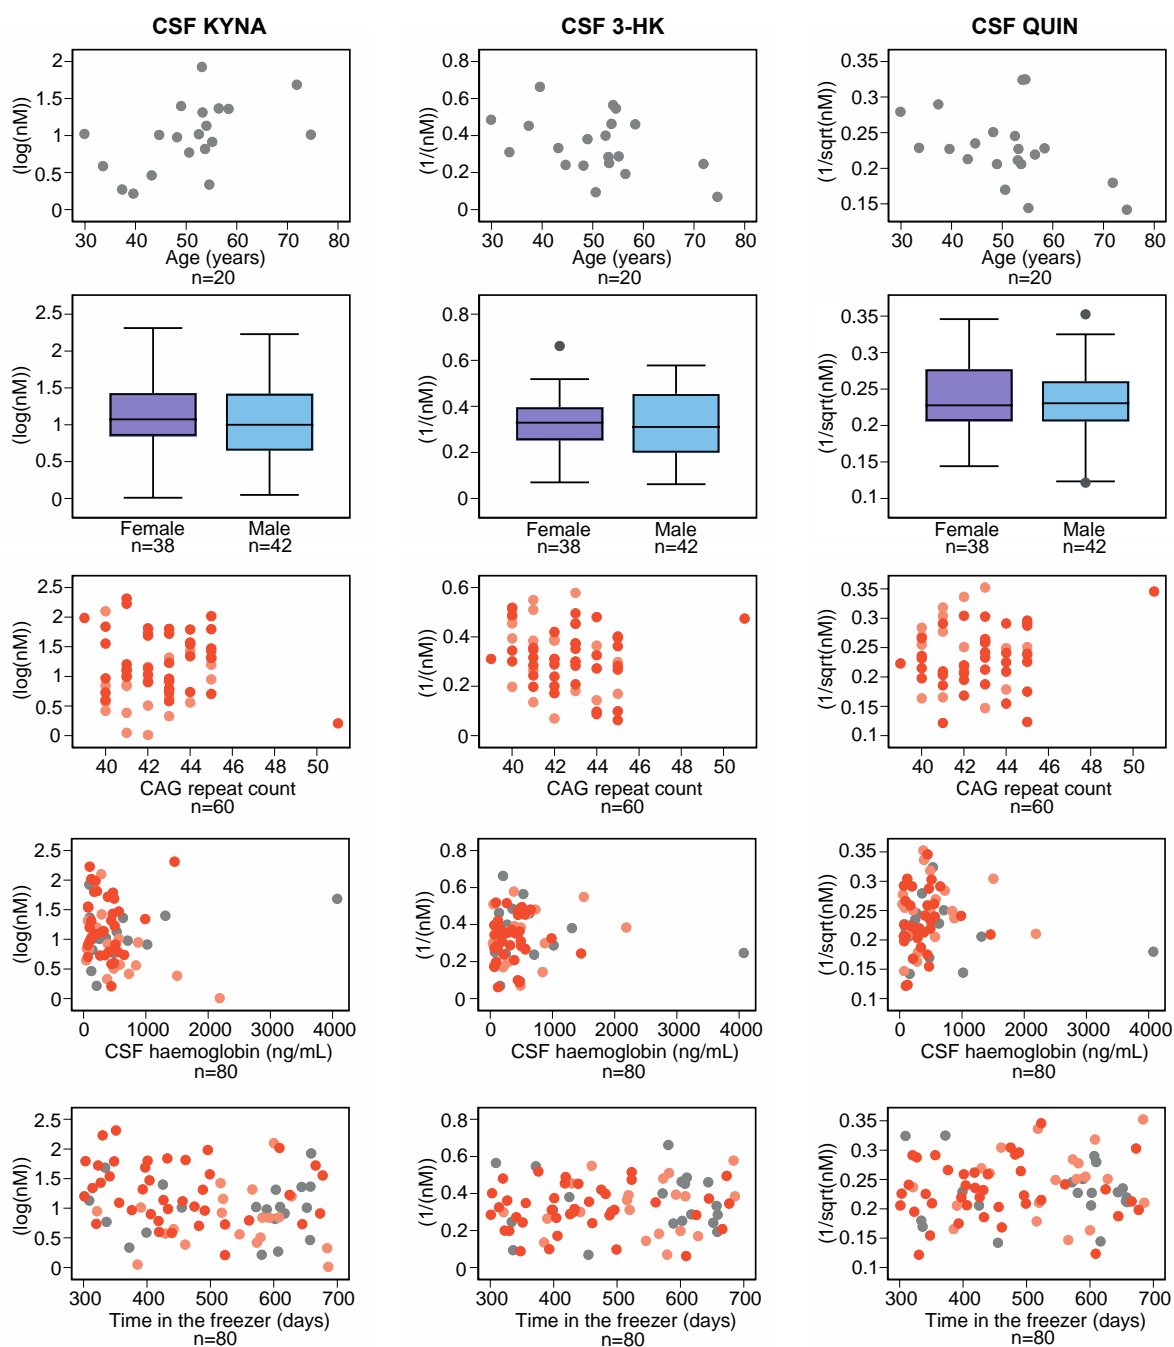

Figure S5 Associations between age (healthy controls only, top row), gender (second row), CAG repeat count (gene expansion carriers only, middle row), CSF haemoglobin (third row) and time in the freezer (bottom row) and primary outcomes: cerebrospinal fluid (CSF) kynurenic acid (KYNA), CSF 3-hydroxykynurenine (3-HK) and CSF quinolinic acid (QUIN). Grey represents healthy controls, light orange preHD and dark orange HD.

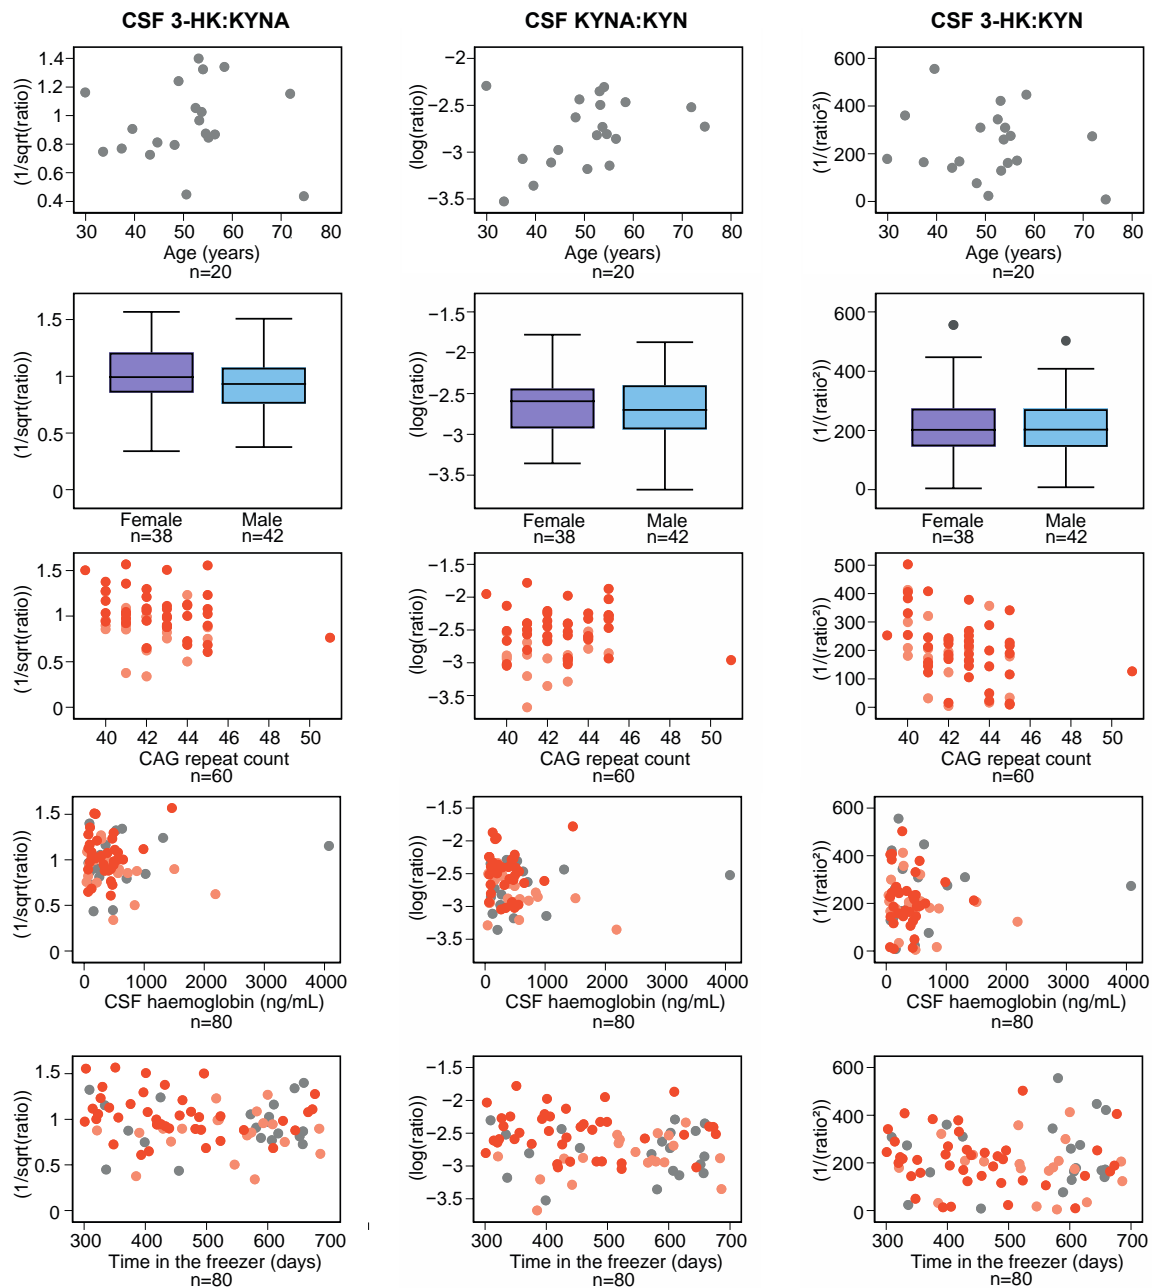

Figure S6 Associations between age (healthy controls only, top row), gender (second row), CAG repeat count (gene expansion carriers only, middle row), CSF haemoglobin (third row) and time in the freezer (bottom row) and secondary outcomes: ratios of cerebrospinal fluid (CSF) 3-hydroxykynurenine to kynurenic acid (3-HK:KYNA), CSF kynurenic acid to kynurenine (KYNA:KYN) and CSF 3-hydroxykynurenine to kynurenine (3-HK:KYN). Grey represents healthy controls, light orange preHD and dark orange HD.



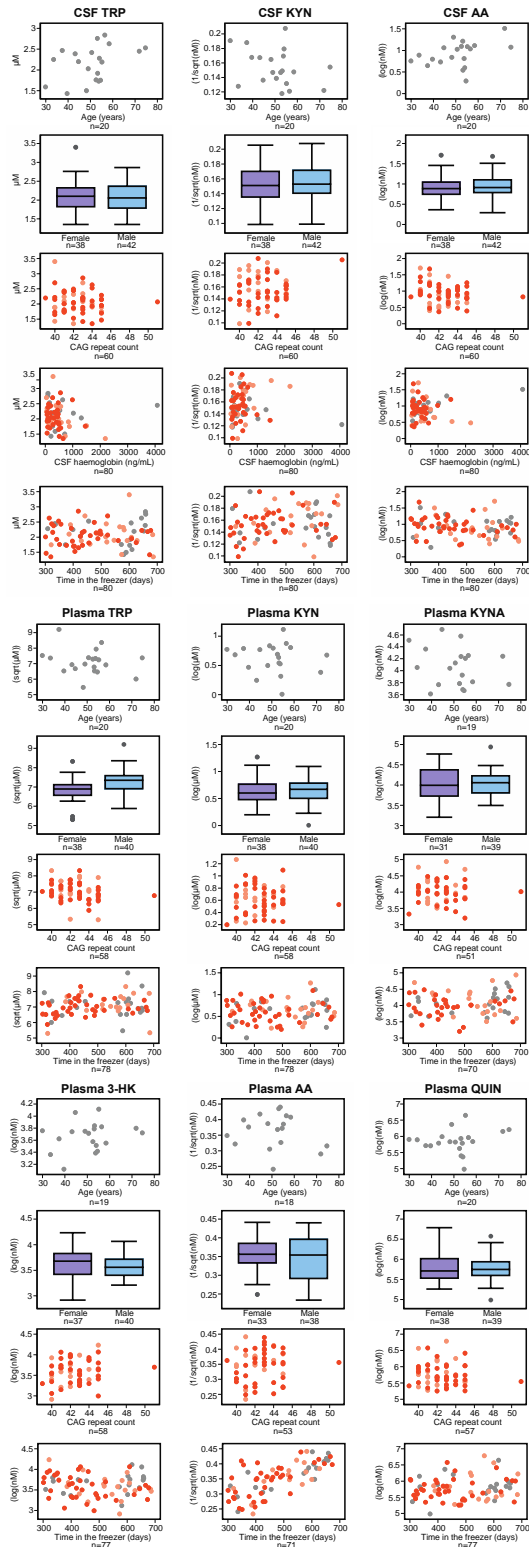

Figure S7 Associations between age (healthy controls only, top row), gender (second row), CAG repeat count (gene expansion carriers only, middle row), CSF haemoglobin (third row) and time in the freezer (bottom row) and exploratory outcomes: cerebrospinal fluid (CSF) tryptophan (TRP), CSF kynurenine (KYN), CSF anthranilic acid (AA), plasma TRP, plasma KYN, plasma KYNA, plasma 3-hydroxykynurenine (3-HK), plasma AA, and plasma quinolinic acid (QUIN). Grey represents healthy controls, light orange preHD and dark orange HD.

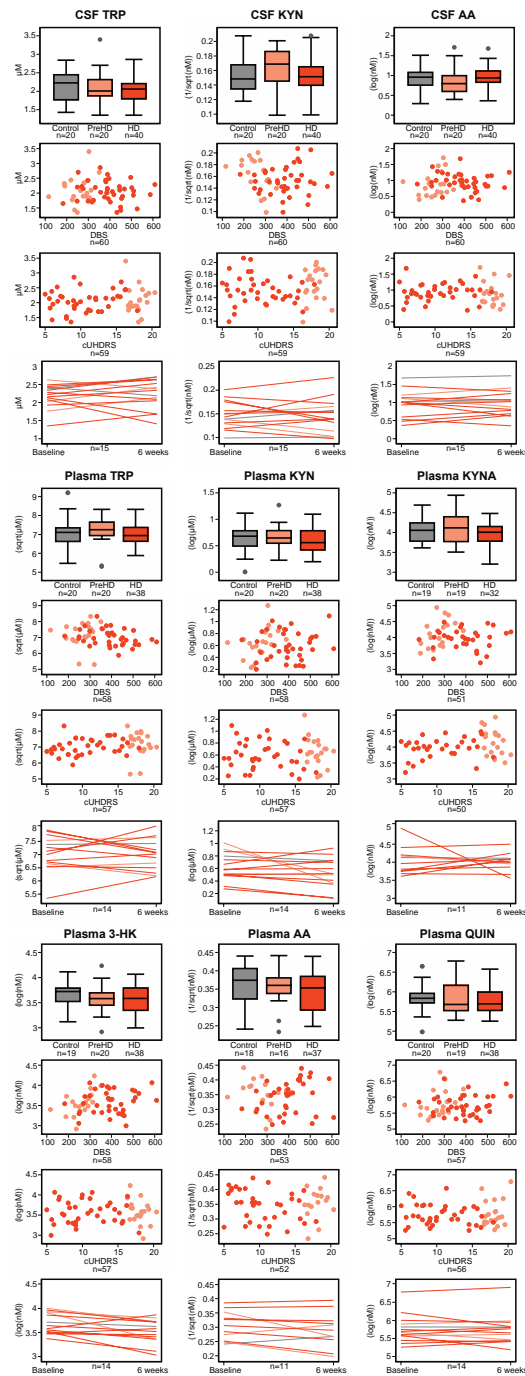

Figure S8 Intergroup differences (top row), associations with Disease Burden Score (DBS, second row) and composite Unified Huntington's Disease Rating Scale (cUHDRS, third row), and within-subject short-term stability (bottom row) for exploratory outcomes: cerebrospinal fluid (CSF) tryptophan (TRP), CSF kynurenine (KYN), CSF anthranilic acid (AA), plasma TRP, plasma KYN, plasma KYNA, plasma 3-hydroxykynurenine (3-HK), plasma AA, and plasma quinolinic acid (QUIN). Grey represents healthy controls, light orange preHD and dark orange HD.

### CSF KYNA

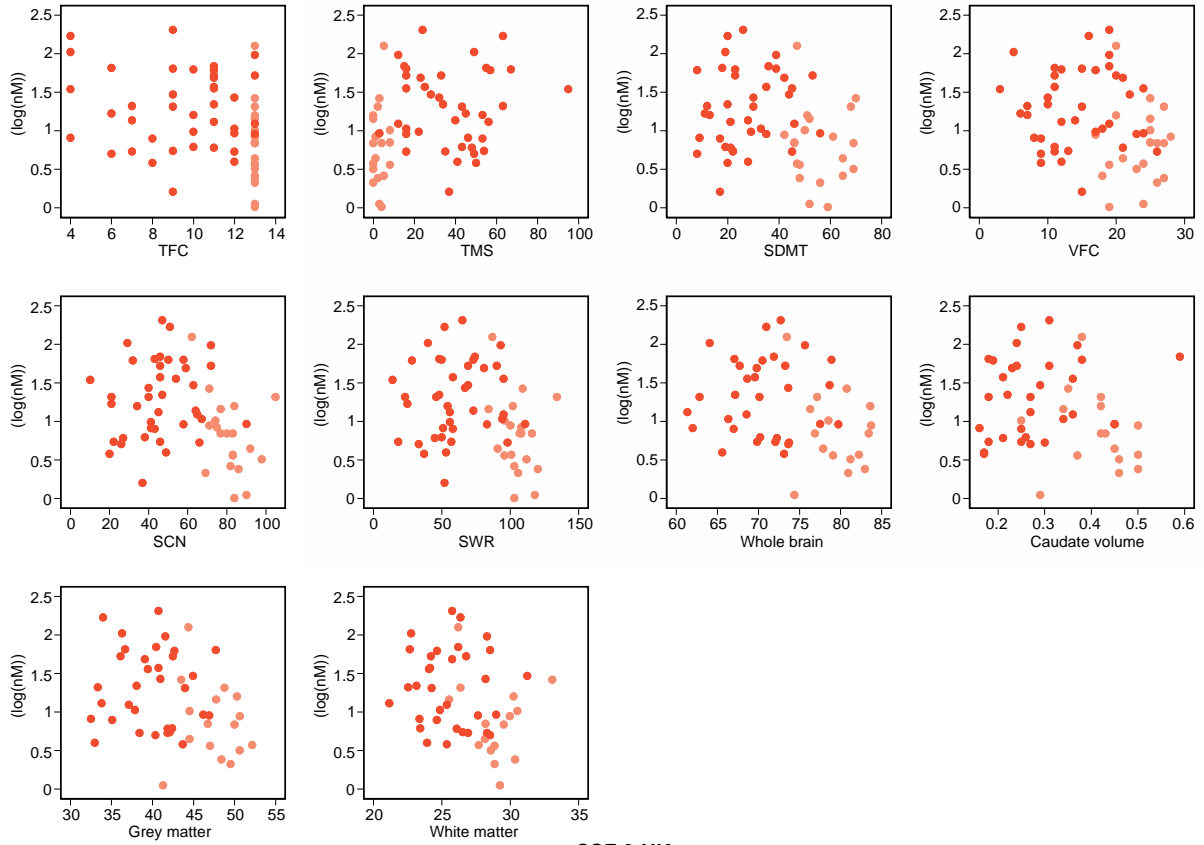

### CSF 3-HK

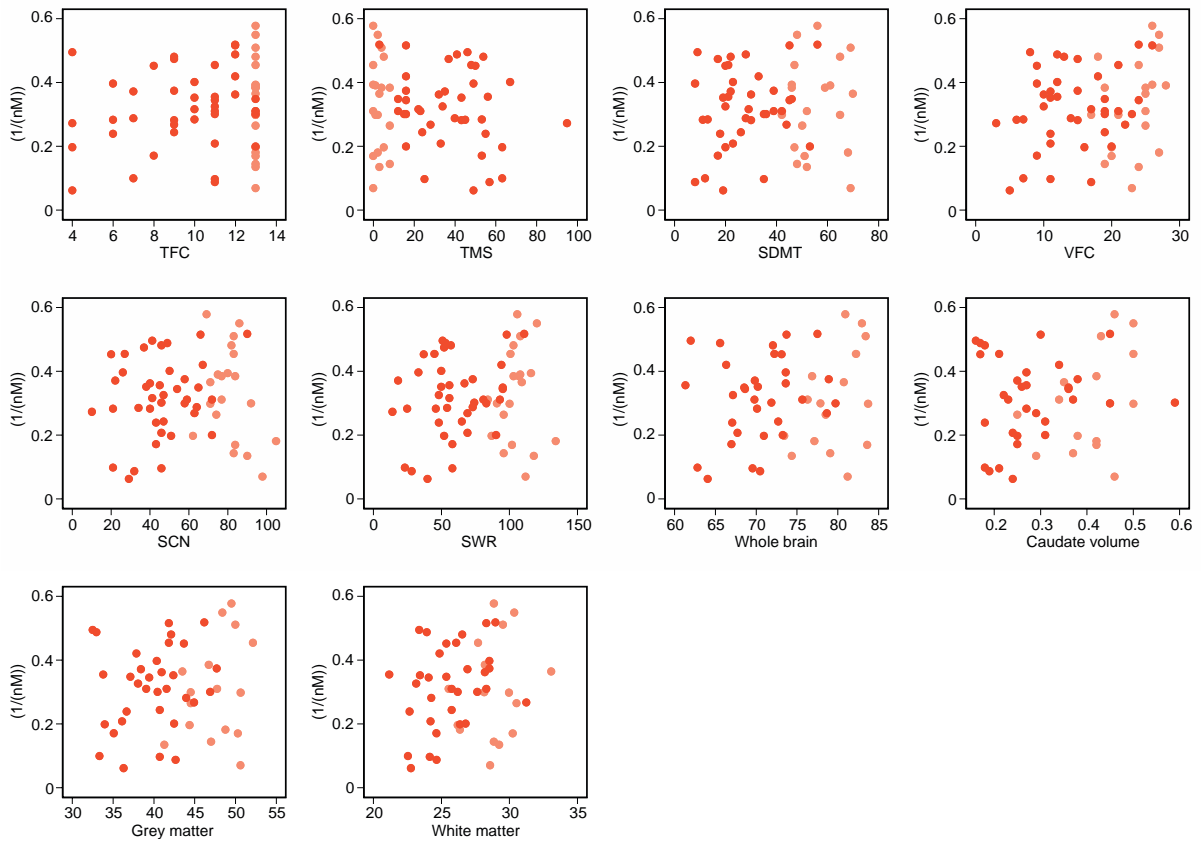

**CSF 3-HK:KYNA**

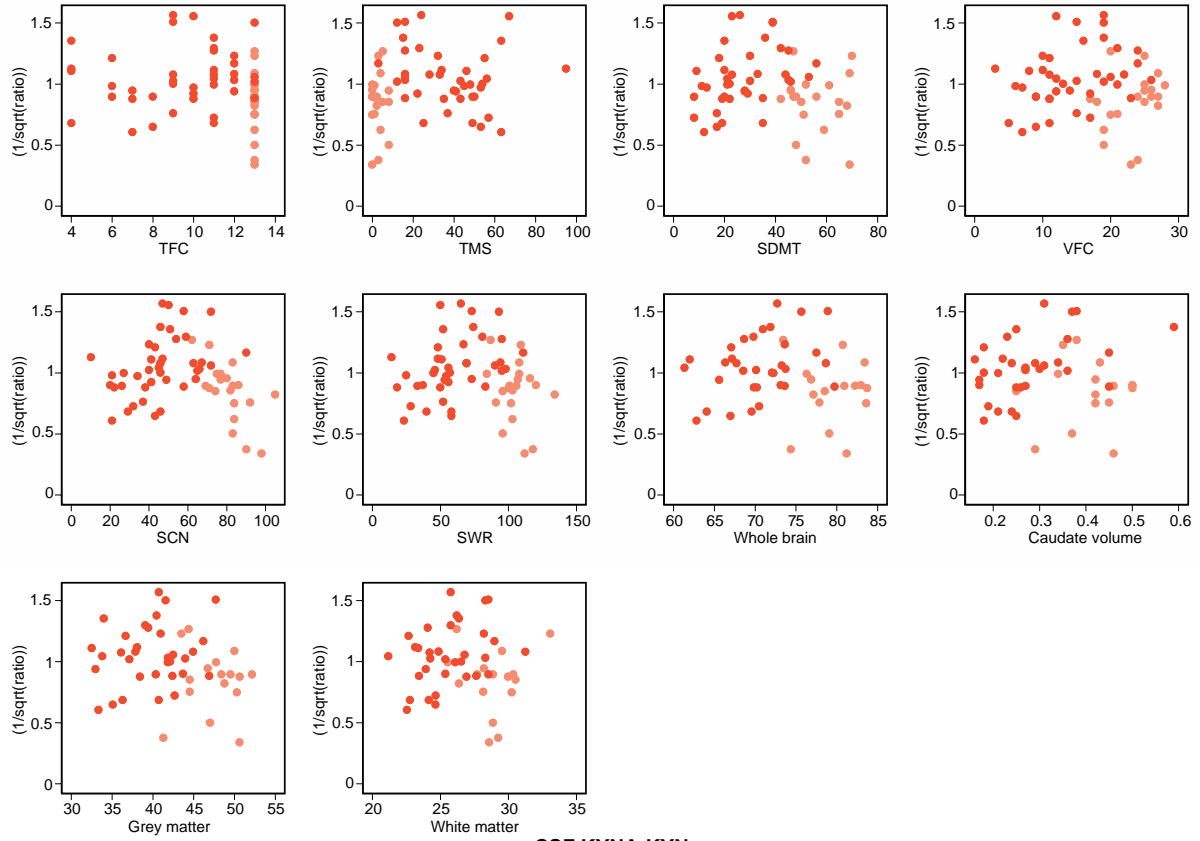

**CSF KYNA:KYN**

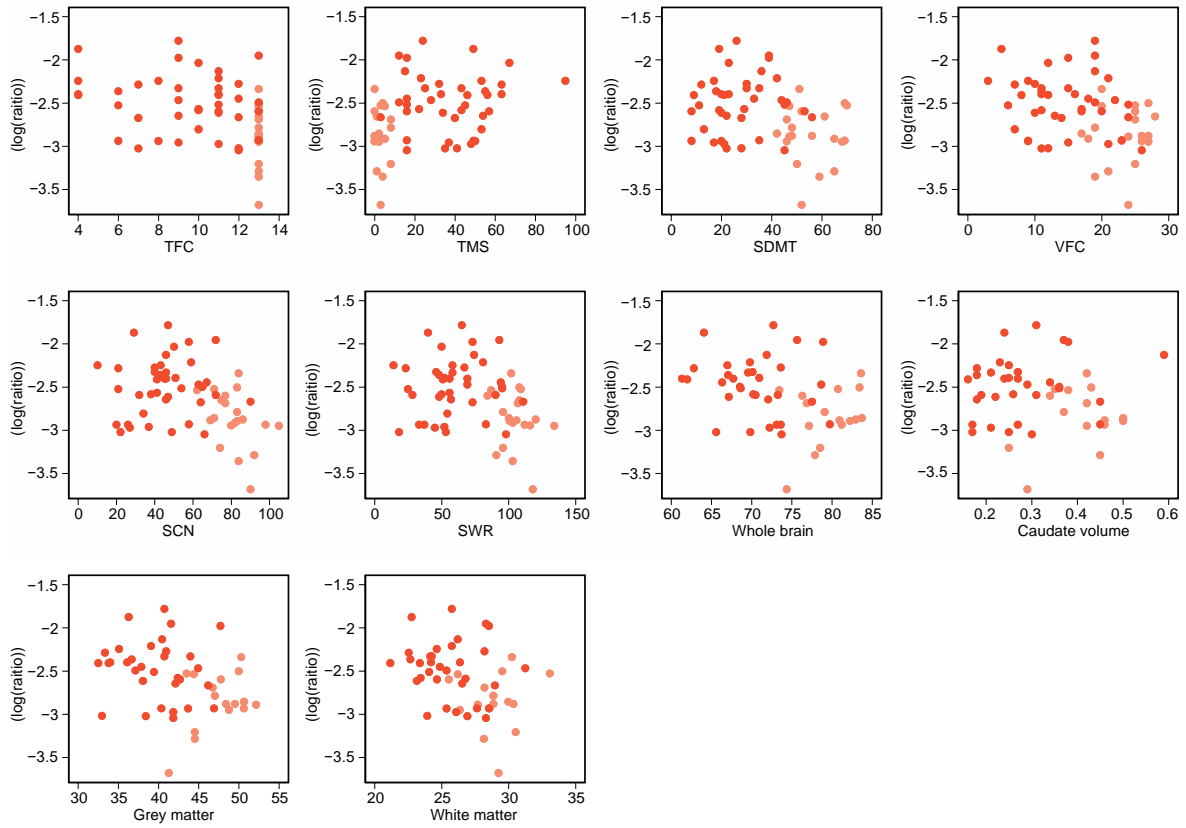

**CSF 3-HK:KYN**

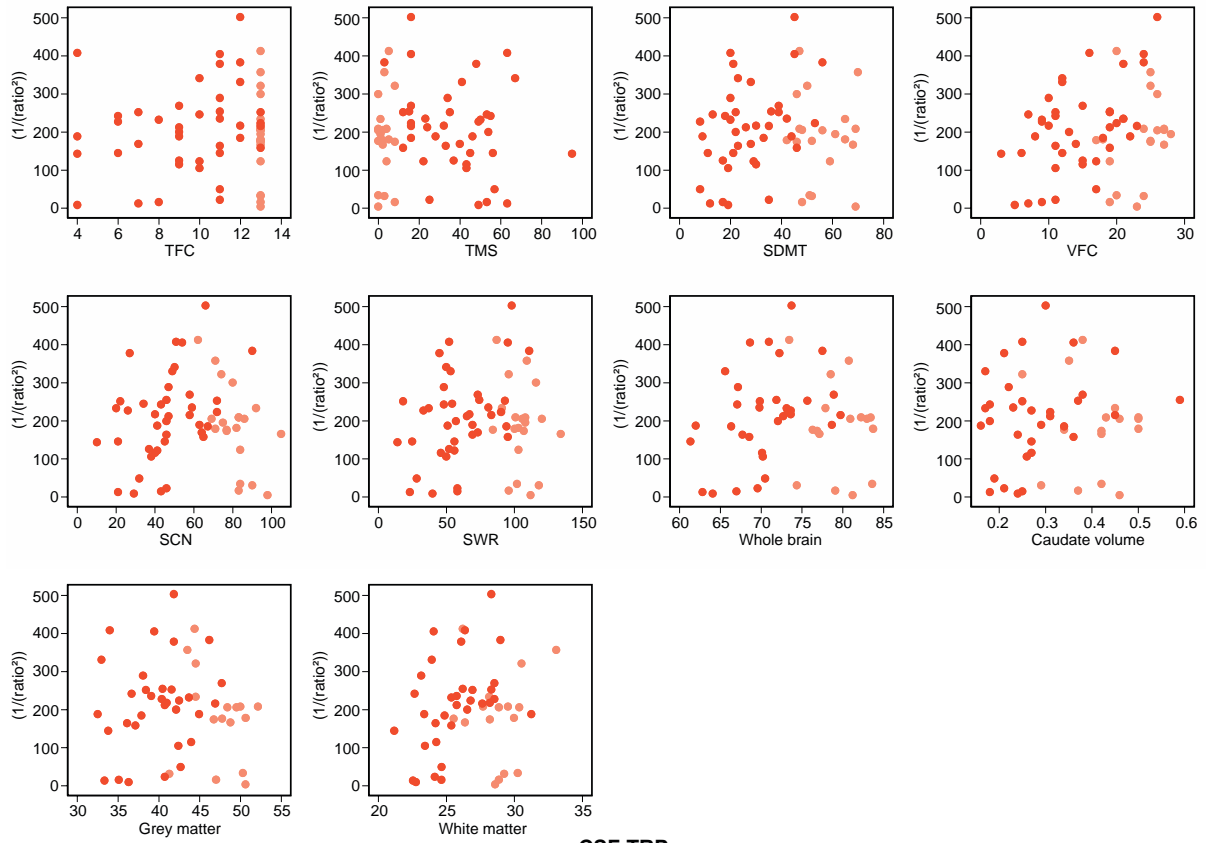

**CSF TRP**

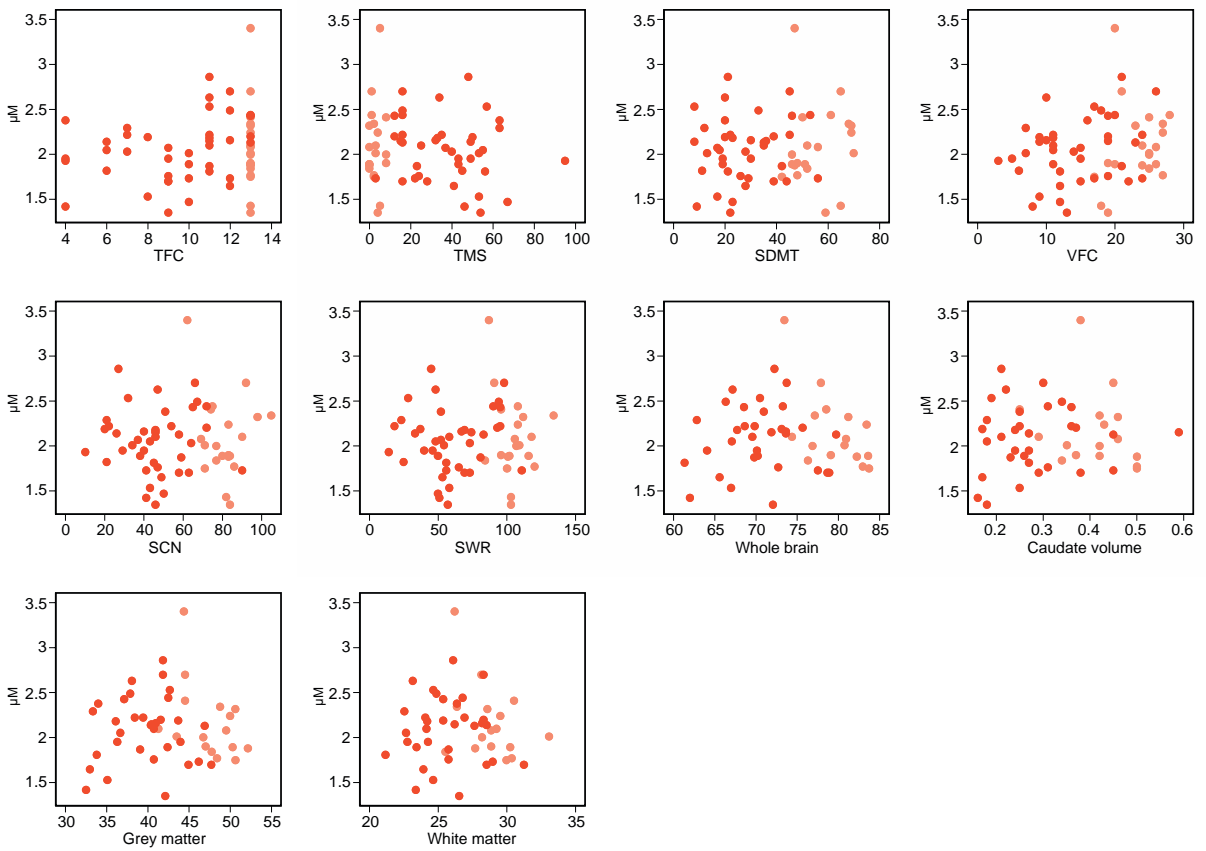

**CSF KYN**

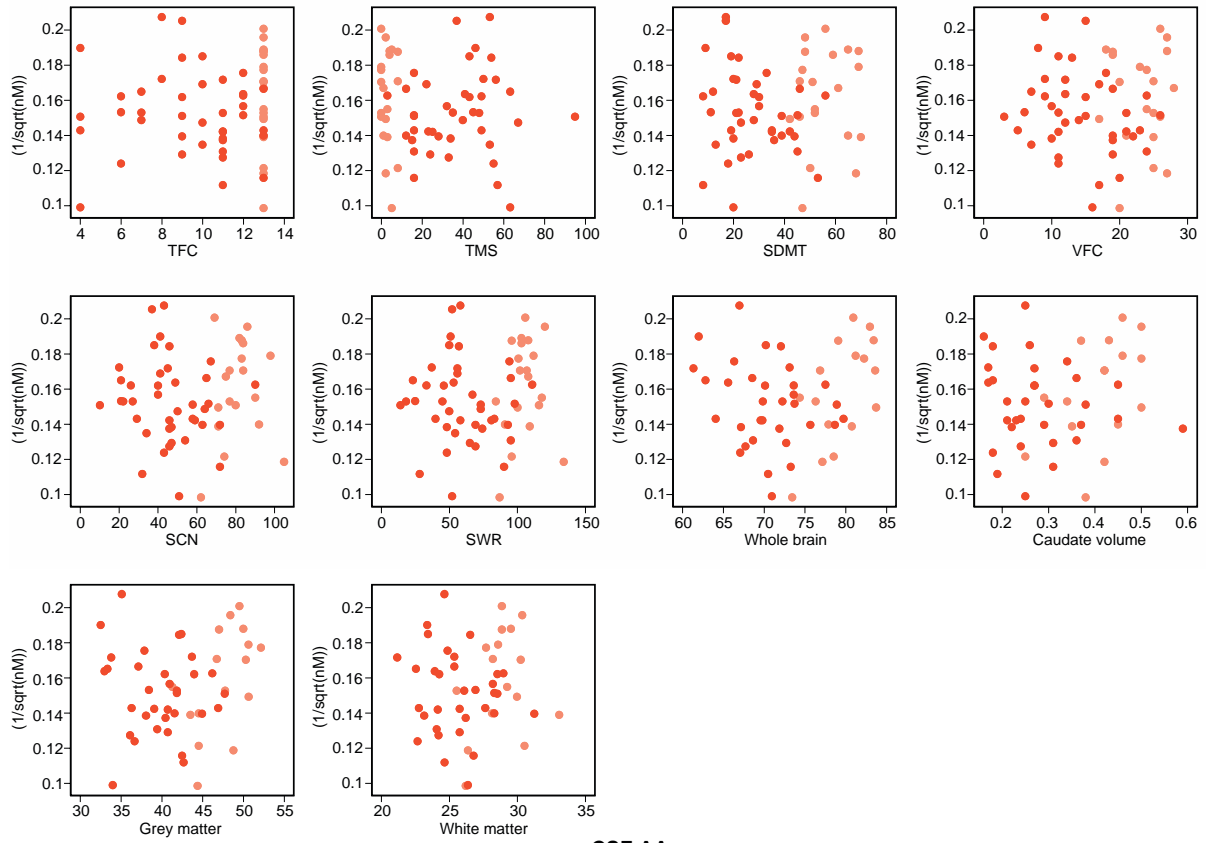

**CSF AA**

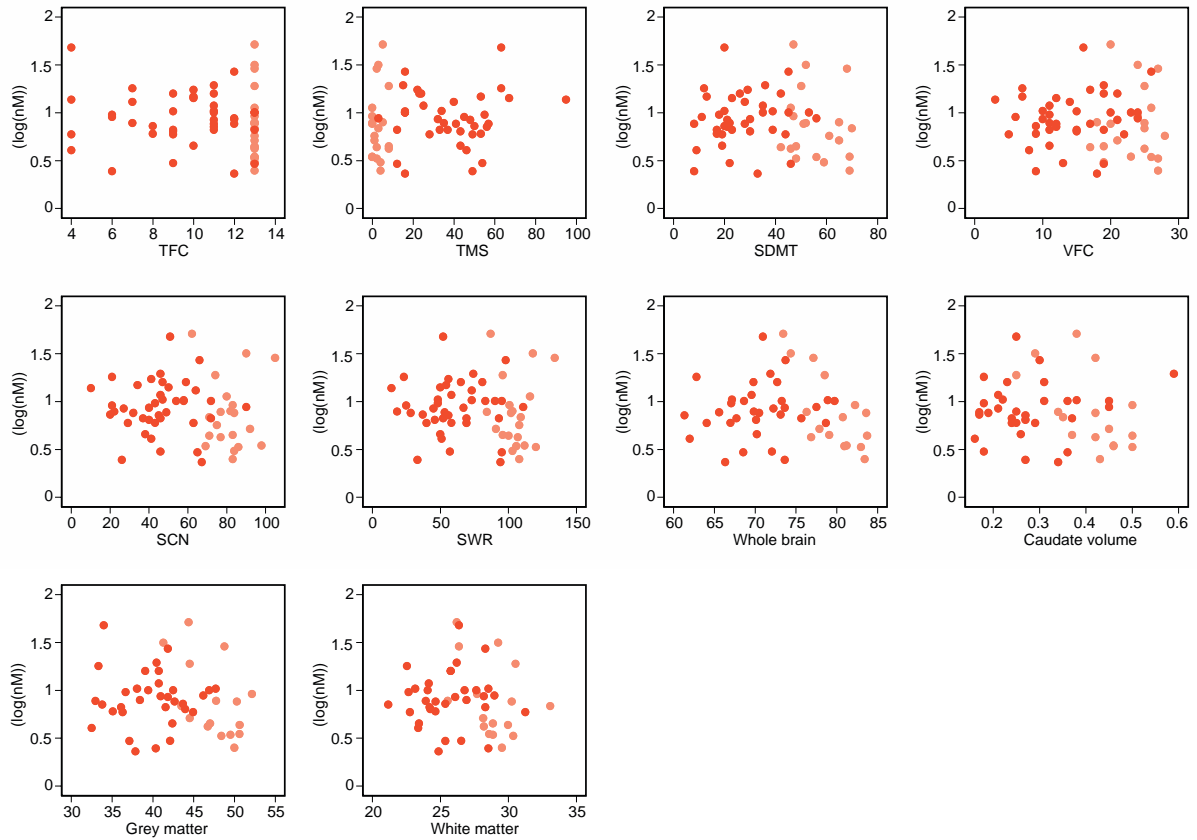

### Plasma TRP

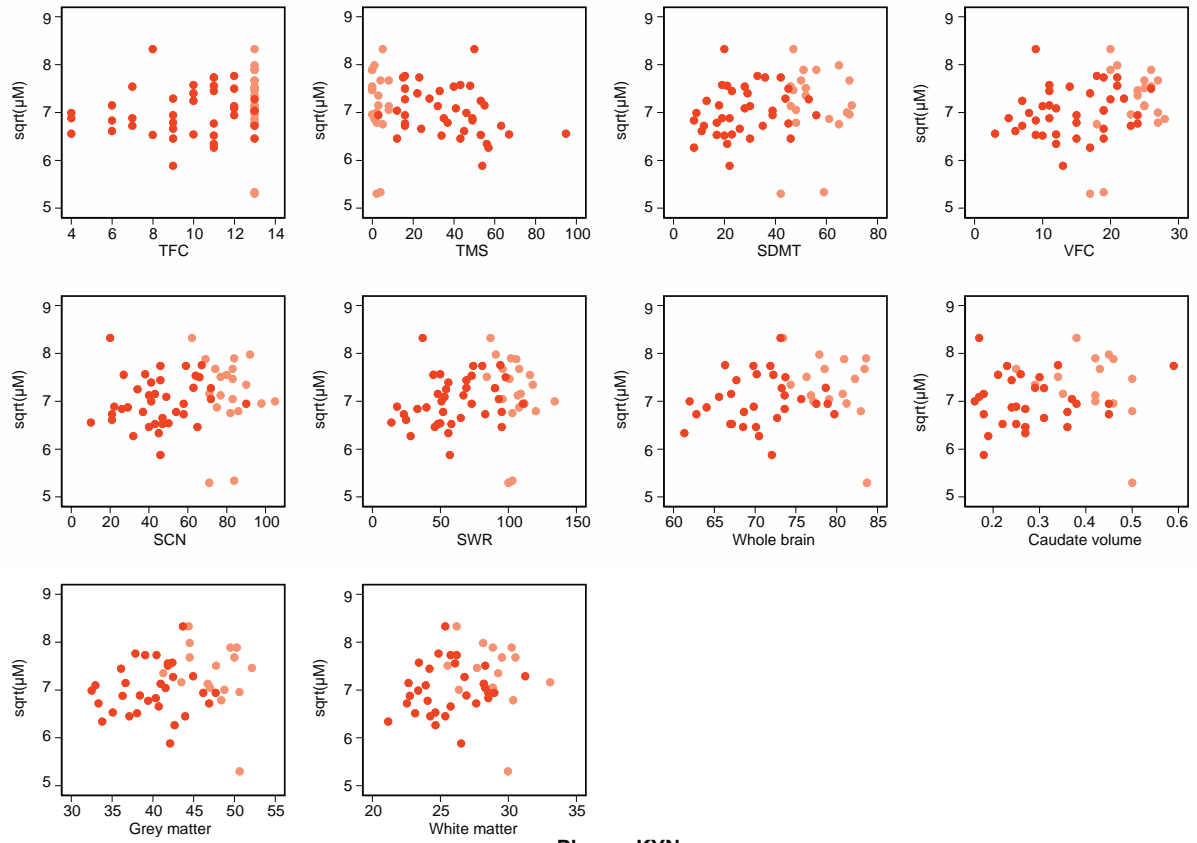

### Plasma KYN

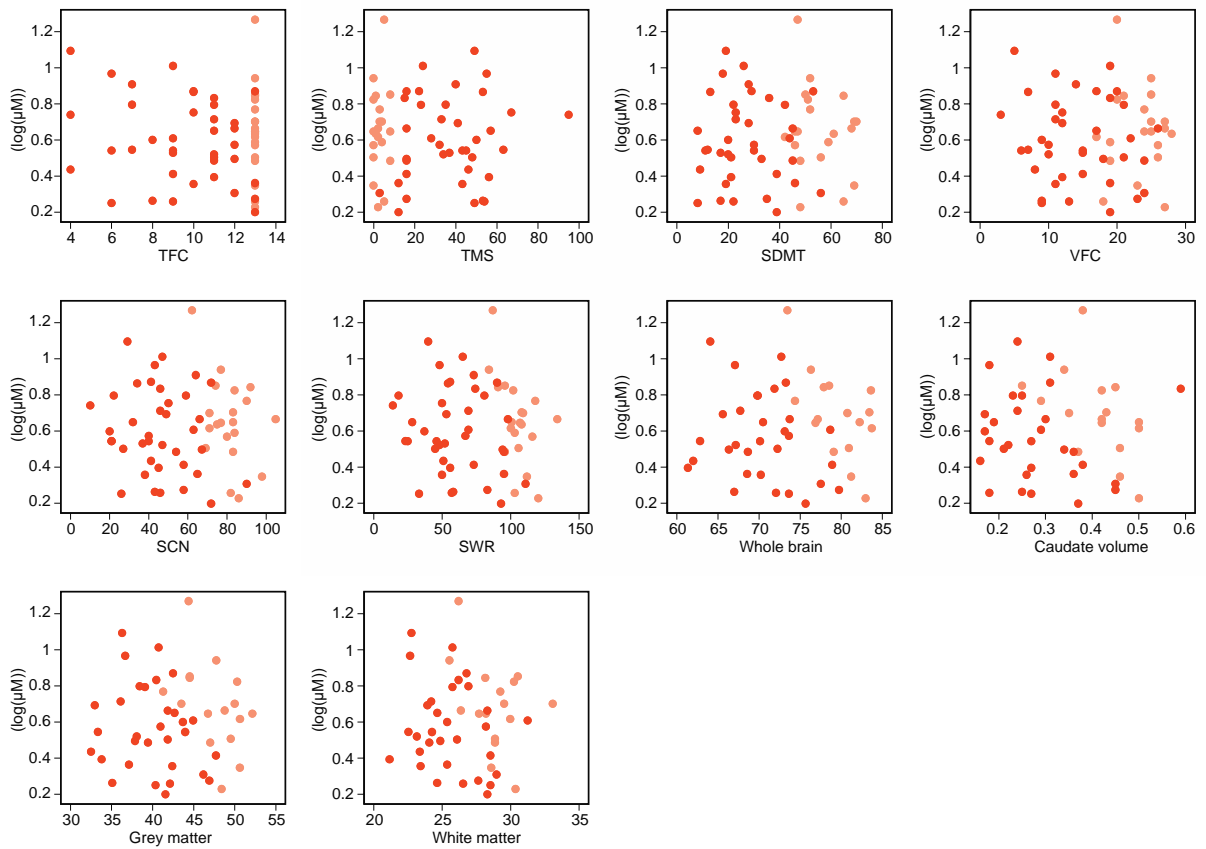

**Plasma KYNA**

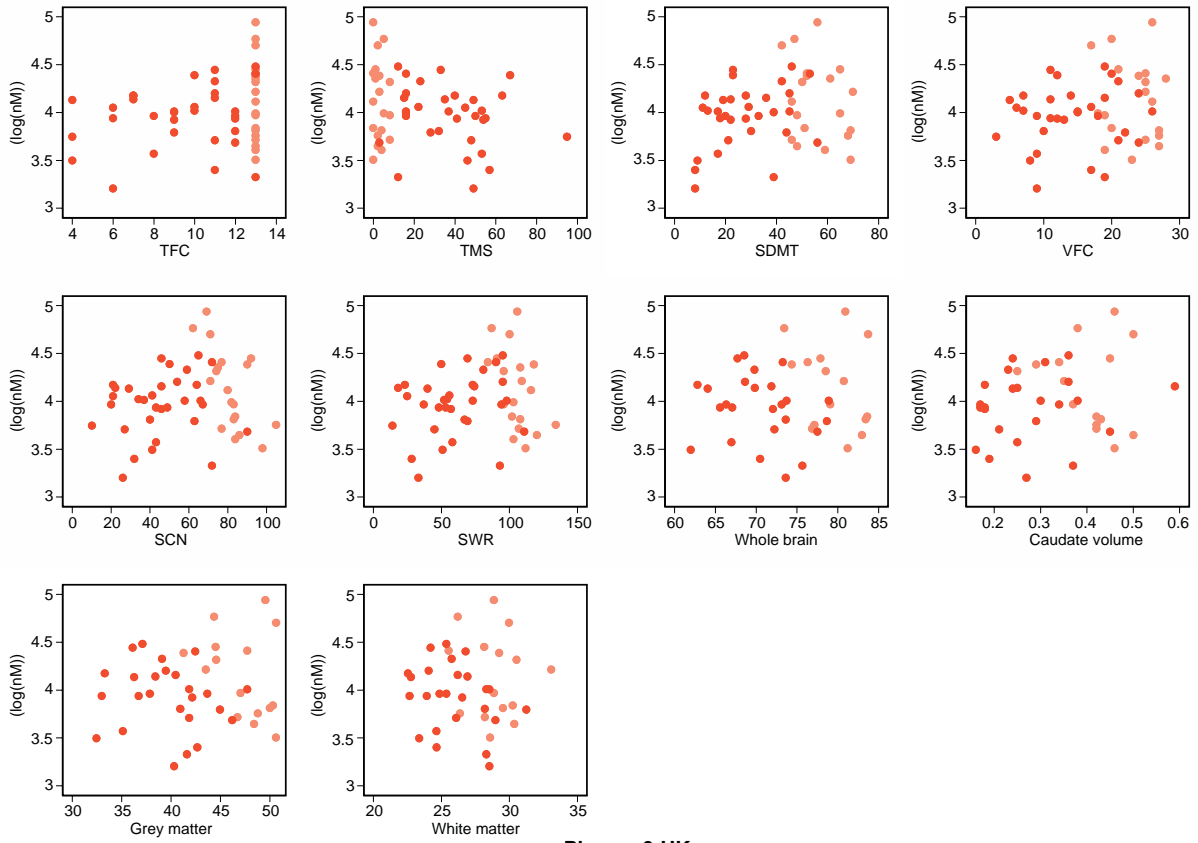

**Plasma 3-HK**

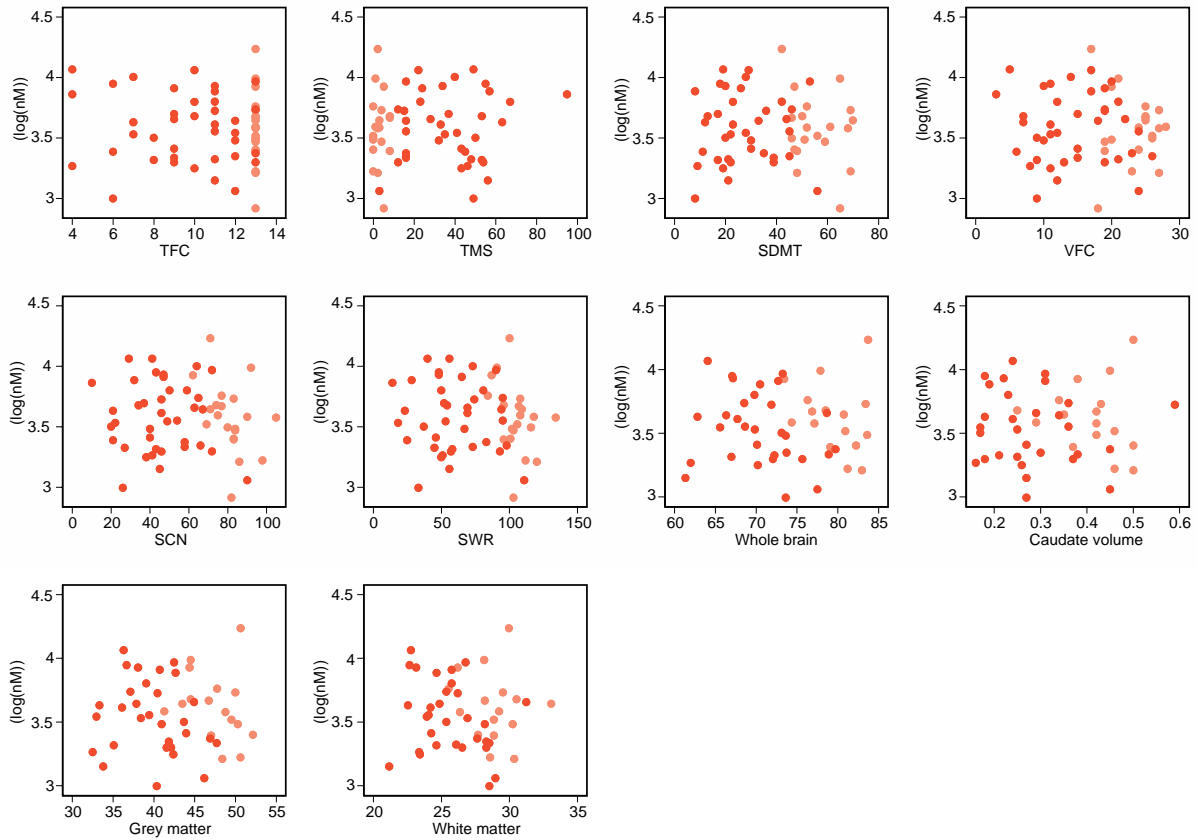



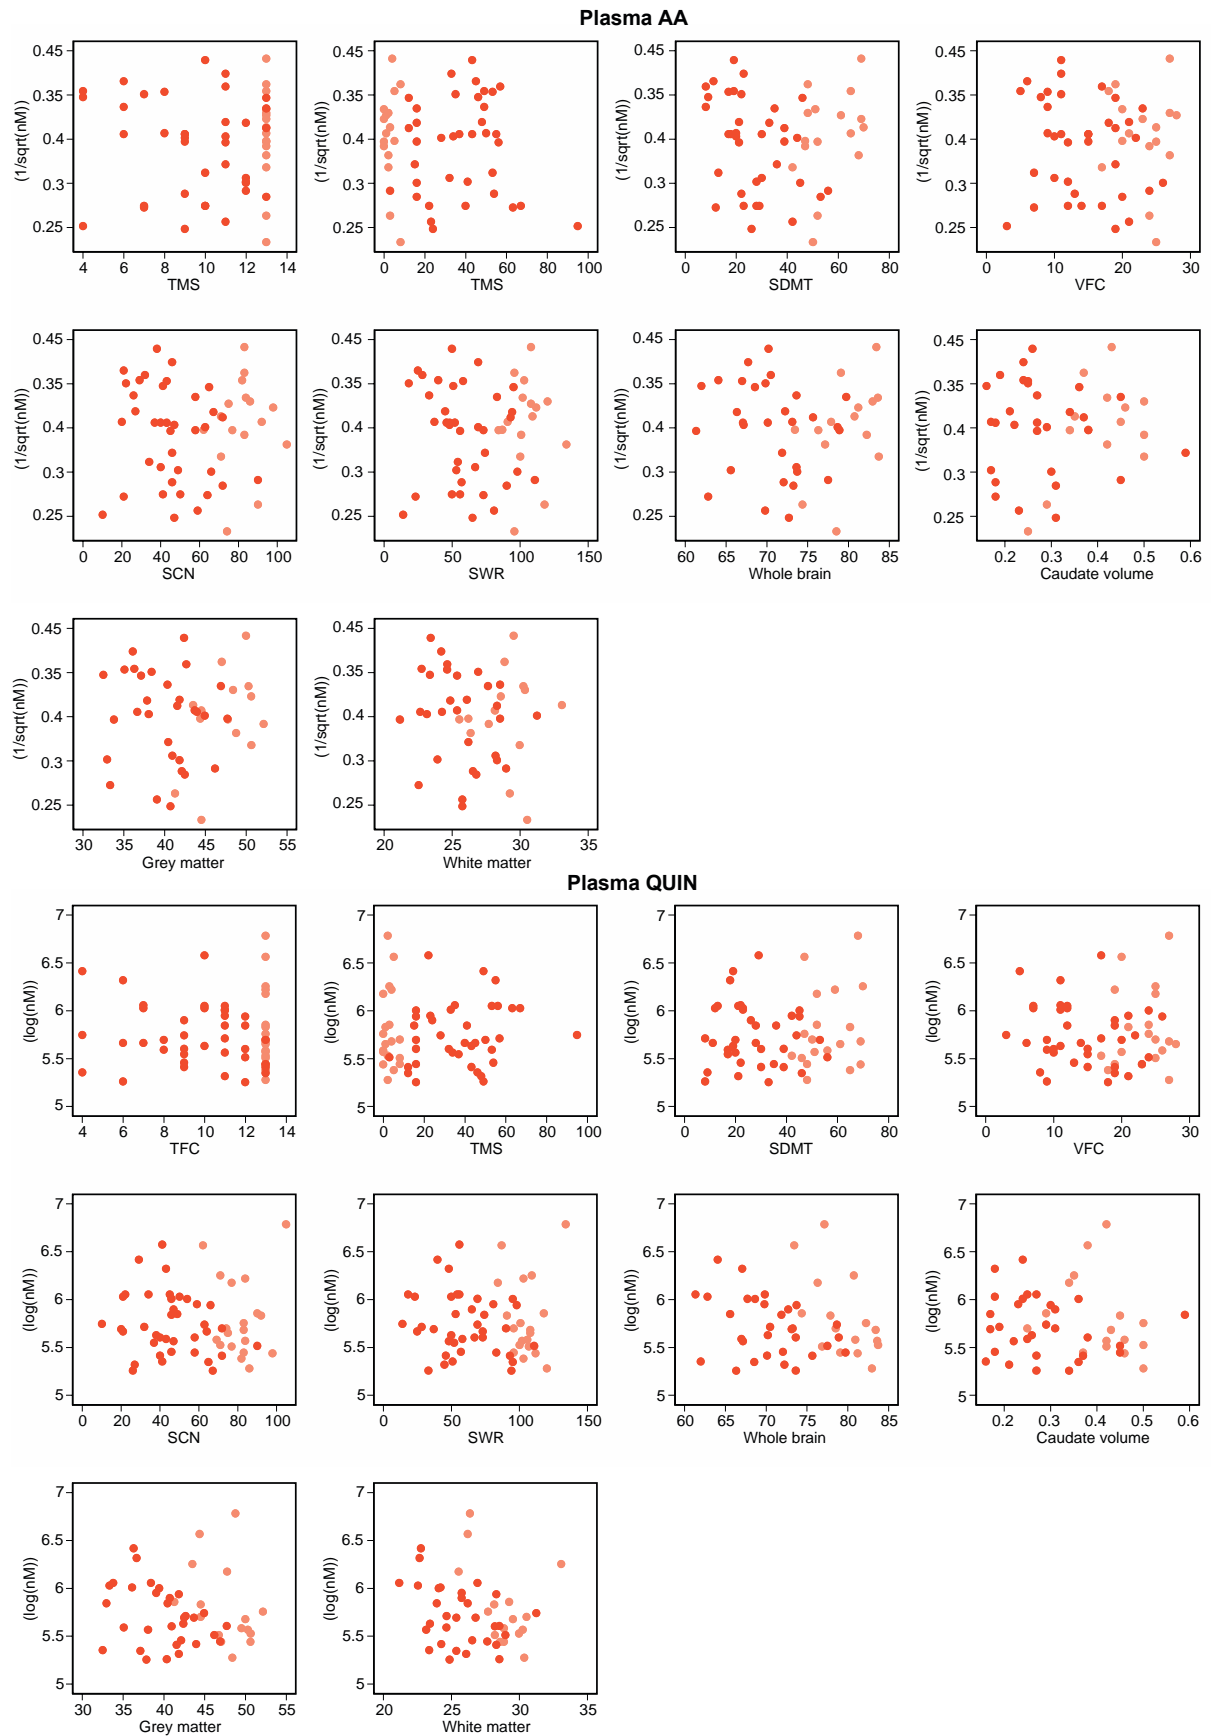

Figure S9 Associations between primary, secondary and exploratory outcomes and clinical and imaging measures. Grey represents healthy controls, light orange preHD and dark orange

HD, 3-HK, 3-hydroxykynurenine; AA, Anthranilic acid; CSF, cerebrospinal fluid; cUHDRS, composite Unified Huntington's Disease Rating Scale; KYN, kynurenine; KYNA, kynurenic acid; QUIN, quinolinic acid; SCN, Stroop Color Naming; SDMT, Symbol Digit Modalities Test; SWR, Stroop Word Reading; TFC, UHDRS Total Functional Capacity; TMS, UHDRS Total Motor Score; TRP, tryptophan; VFC, Verbal Fluency – Categorical.

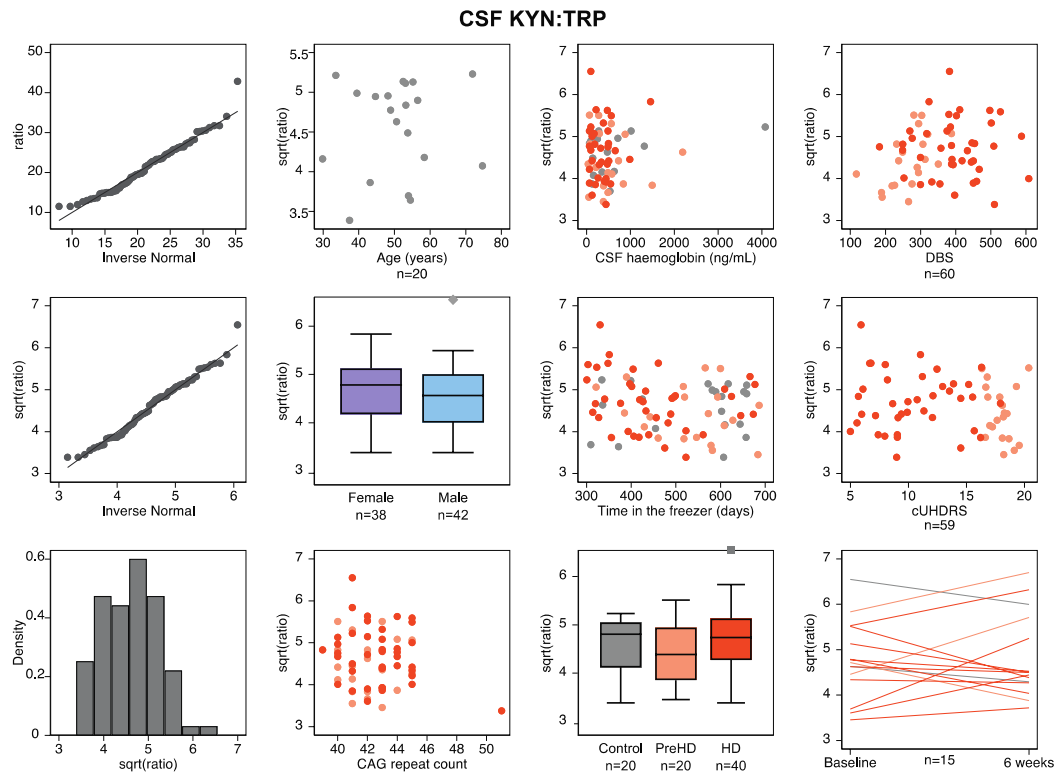

Figure S10 Post-hoc exploratory analyses of CSF KYN:TRP ratio. Distributions and arithmetic operations used (left column): top row depicts a quantile-quantile plot for observed distribution against normal distribution, middle row shows a quantile-quantile plot for transformed distribution against normal distribution, and the bottom row a histogram for transformed distribution. Associations between age (healthy controls only, top row, left middle column), gender (middle row, left middle column), CAG repeat count (gene expansion carriers only, bottom row, left middle column), CSF haemoglobin (top row, right middle column) and time in the freezer (middle row, right middle column). Intergroup differences (bottom row, right middle column), associations with Disease Burden Score (DBS, top row, left column) and composite Unified Huntington's Disease Rating Scale (cUHDRS, middle row, left column), and within-subject short-term stability (bottom row, left column). Associations were not found in any of the analyses. See **Error! Reference source not found.**, Table S2 and Table S3 for point estimates and 95% CI. Grey represents healthy controls, light orange preHD and dark orange HD.

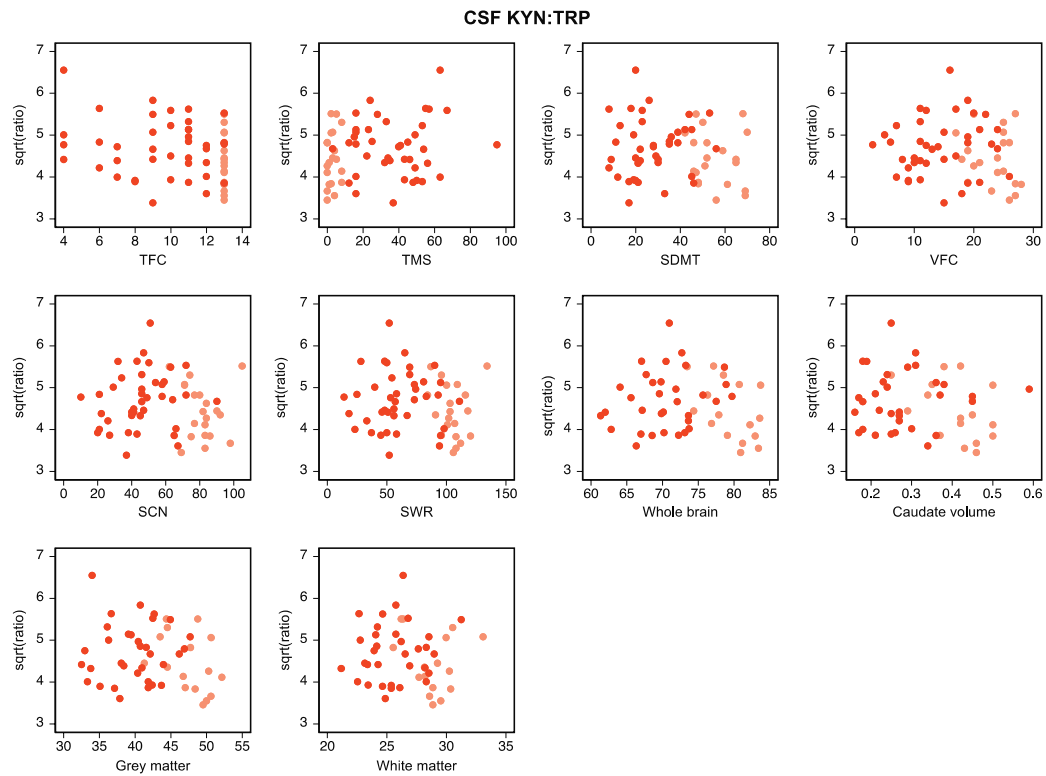

Figure S11 Associations between exploratory post-hoc outcome (CSF KYN:TRP ratio) and clinical and imaging measures. Grey represents healthy controls, light orange preHD and dark orange HD. CSF, cerebrospinal fluid; cUHDRS, composite Unified Huntington's Disease Rating Scale; KYN, kynurenine; SCN, Stroop Color Naming; SDMT, Symbol Digit Modalities Test; SWR, Stroop Word Reading; TFC, UHDRS Total Functional Capacity; TMS, UHDRS Total Motor Score; TRP, tryptophan; VFC, Verbal Fluency – Categorical.
